# Supplementary material for: High Dimensional Characterization of Post-acute Sequalae of COVID-19: analysis of health outcomes and clinical manifestations at 6 months
Source: Research Square preprint supplement (doi:10.21203/rs.3.rs-150398/v1), 2021-01-21
Supplement: Supplementary file 3 [file 4b8602ce2050a90772eb054f.xlsx]

## Sheet: hospitalized COVID vs flu lab
Supplementary information table 6: Identification of the post-acute incident laboratory abnormalities in people who had been hospitalized with COVID-19 vs. those who had been hospitalized with seasonal influenza
People who had been hospitalized with seasonal influenza served as the referent category
Model based on survival models adjusted through overlap weighting
Outcomes were ascertained from day 30 after hospital admission until end of follow-up
Laboratory abnormalities with less than 10 event in either group were not modelled
A P value of less than 6.57*10^-5 was considered statistically significant
Labortary test	Abnormal	Criteria	Unit	P value	Hazard ratio (95% Confidence interval)	Incident rate per 1000 at 6-months in hospitalized COVID-19 (95% confidence interval)	Incident rate per 1000 at 6-months in hospitalized seasonal influenza (95% confidence interval)	Excess burden per 1000 hospitalized COVID-19 patients at 6-months (95% confidence interval)
Absolute T cell count	Higher than	1740	U/L
Absolute T cell count	Lower than	359	U/L	0.210978	1.84 (0.71, 4.77)	1.55 (4.01, 0.6)	0.84 (0.32, 2.18)	0.71 (-0.64, 1.22)
Alanine aminotransferase	Higher than	40	U/L	2.1751e-08	1.42 (1.25, 1.6)	90.28 (101.39, 80.33)	64.58 (57.37, 72.65)	25.7 (17.62, 32.91)
Aspartate aminotransferase	Higher than	40	U/L	0.000227079	1.28 (1.12, 1.47)	72.3 (82.16, 63.59)	56.76 (49.87, 64.57)	15.54 (7.73, 22.44)
Blood urea nitrogen	Higher than	25	mg/dL	0.00483138	1.18 (1.05, 1.33)	110.5 (123.18, 99.04)	94.39 (84.53, 105.34)	16.11 (5.16, 25.97)
Blood urea nitrogen	Lower than	7	mg/dL	0.0399855	1.24 (1.01, 1.52)	25.53 (31.24, 20.85)	20.65 (16.86, 25.28)	4.88 (0.25, 8.67)
Brain natriuretic peptide	Higher than	100	pg/mL	0.196889	1.11 (0.95, 1.3)	45.19 (52.61, 38.8)	40.88 (35.08, 47.6)	4.31 (-2.41, 10.11)
C Reactive Protein	Higher than	4.9	mg/dL	7.7569e-07	1.67 (1.37, 2.05)	27 (33.02, 22.06)	16.22 (13.24, 19.86)	10.78 (7.14, 13.76)
Carbon Dioxide	Higher than	32	mmol/L	0.110224	1.14 (0.97, 1.35)	38.65 (45.39, 32.9)	33.9 (28.84, 39.82)	4.75 (-1.17, 9.81)
Carbon Dioxide	Lower than	22	mmol/L	0.000198725	1.24 (1.11, 1.39)	101.08 (112.55, 90.71)	82.26 (73.75, 91.72)	18.81 (9.36, 27.33)
CD4/CD8 Ratio	Higher than	5	ratio
CD4/CD8 Ratio	Lower than	0.8	ratio
Direct bilirubin	Higher than	0.5	mg/dL	0.546845	0.92 (0.71, 1.2)	13.55 (17.54, 10.46)	14.67 (11.32, 18.99)	-1.12 (-5.44, 2.22)
estimated glomerular filtration rate	Lower than	60	mL/min	0.00742403	0.82 (0.71, 0.95)	66.94 (76.94, 58.2)	80.95 (70.45, 92.94)	-14.01 (-25.99, -3.51)
Ferritin	Higher than	M: 388; F:252	ng/mL	2.04367e-09	1.72 (1.44, 2.05)	40.58 (48.24, 34.11)	23.82 (20, 28.37)	16.76 (12.21, 20.58)
Ferritin	Lower than	M: 22; F: 10	ng/mL	0.666014	1.07 (0.8, 1.43)	12.95 (17.28, 9.7)	12.15 (9.1, 16.21)	0.8 (-3.27, 3.85)
Hematocrit	Higher than	M: 52; F: 47	%	0.230609	1.25 (0.87, 1.79)	6.65 (9.54, 4.64)	5.33 (3.72, 7.65)	1.32 (-1, 2.93)
Hematocrit	Lower than	M: 42; F: 37	%	1.13868e-05	1.26 (1.13, 1.39)	267.99 (292.05, 245.56)	219.95 (200.98, 240.43)	48.04 (27.56, 67.01)
Hemoglobin	Higher than	M: 18; F: 16	g/dL	0.546845	1.19 (0.68, 2.06)	2.68 (4.64, 1.54)	2.26 (1.3, 3.92)	0.42 (-1.24, 1.37)
Hemoglobin	Lower than	M: 14; F: 12	g/dL	2.80197e-06	1.28 (1.16, 1.42)	246.89 (269.97, 225.47)	198.33 (180.61, 217.55)	48.56 (29.34, 66.28)
Hemoglobin A1C	Higher than	5.6	%	0.683331	1.03 (0.89, 1.19)	104.21 (119.57, 90.73)	101.26 (88.14, 116.21)	2.95 (-12, 16.08)
Hemoglobin A1C	Lower than	4	%
High density lipoprotein cholesterol	Higher than	60	mg/dL	0.267972	1.12 (0.92, 1.36)	29.99 (36.45, 24.66)	26.86 (22.08, 32.65)	3.14 (-2.66, 7.92)
High density lipoprotein cholesterol	Lower than	40	mg/dL	0.760023	0.98 (0.85, 1.12)	71.35 (81.44, 62.46)	72.84 (63.78, 83.13)	-1.49 (-11.78, 7.57)
High-sensitivity C-reactive protein	Higher than	3	mg/L	9.71812e-16	2.15 (1.78, 2.59)	38.85 (46.65, 32.34)	18.25 (15.17, 21.97)	20.6 (16.89, 23.69)
International normalized ratio	Higher than	1.2	ratio	0.0230903	1.16 (1.02, 1.33)	70.75 (80.26, 62.32)	61.07 (53.77, 69.34)	9.67 (1.41, 16.98)
International normalized ratio	Lower than	0.8	ratio
Low density lipoprotein cholesterol	Higher than	130	mg/dL	0.000859979	1.36 (1.13, 1.63)	34.61 (41.29, 29)	25.61 (21.44, 30.58)	9.01 (4.03, 13.18)
Microalbumin/Creatinine Ratio	Higher than	30	mg/g	0.226231	1.14 (0.92, 1.41)	23.27 (28.66, 18.88)	20.46 (16.6, 25.2)	2.81 (-1.93, 6.67)
Partial thromboplastin time	Higher than	36.5	SEC	0.00121224	1.26 (1.1, 1.45)	58.61 (67.14, 51.13)	46.77 (40.77, 53.63)	11.83 (4.98, 17.83)
Partial thromboplastin time	Lower than	24	SEC	0.0709329	0.73 (0.52, 1.03)	7.34 (10.35, 5.2)	10.08 (7.15, 14.2)	-2.73 (-6.86, 0.2)
Platelet Count	Higher than	400	K/cmm	1.7062e-16	1.94 (1.65, 2.26)	51.02 (59.43, 43.77)	26.7 (22.87, 31.17)	24.31 (19.85, 28.15)
Platelet Count	Lower than	150	K/cmm	0.0855858	0.88 (0.76, 1.02)	56.04 (64.64, 48.55)	63.52 (55.06, 73.23)	-7.48 (-17.19, 0.98)
Pro B Natriuretic Peptide	Higher than	age <=75:125; age >75:450	pg/mL	0.028752	0.8 (0.66, 0.98)	24.31 (29.53, 20)	30.2 (24.86, 36.66)	-5.89 (-12.35, -0.55)
Prothrombin time	Higher than	14.7	sec	0.243815	1.08 (0.95, 1.23)	71.22 (80.55, 62.94)	66.17 (58.46, 74.87)	5.04 (-3.65, 12.76)
Prothrombin time	Lower than	11.5	sec	0.431084	0.92 (0.76, 1.13)	24.36 (29.69, 19.98)	26.38 (21.64, 32.14)	-2.02 (-7.78, 2.72)
Serum albumin	Higher than	5	g/dL	0.0206783	2.01 (1.11, 3.63)	3.36 (6.06, 1.86)	1.67 (0.93, 3.02)	1.69 (0.34, 2.43)
Serum albumin	Lower than	3.5	g/dL	1.18342e-12	1.42 (1.29, 1.56)	163 (177.9, 149.23)	117.97 (107.76, 129.08)	45.03 (33.92, 55.24)
Serum alkaline phosphatase	Higher than	136	U/L	0.00123482	1.3 (1.11, 1.52)	46 (53.67, 39.4)	35.63 (30.5, 41.61)	10.37 (4.39, 15.51)
Serum alkaline phosphatase	Lower than	40	U/L	0.619835	0.92 (0.65, 1.3)	7.29 (10.28, 5.16)	7.95 (5.63, 11.22)	-0.66 (-3.93, 1.65)
Serum calcium	Higher than	10.5	mg/dL	0.126959	1.25 (0.94, 1.66)	12.98 (17.21, 9.78)	10.41 (7.85, 13.81)	2.56 (-0.84, 5.13)
Serum calcium	Lower than	8.5	mg/dL	3.03049e-05	1.26 (1.13, 1.41)	113.18 (125.36, 102.11)	90.85 (81.87, 100.77)	22.33 (12.41, 31.31)
Serum chloride	Higher than	107	mmol/L	0.00409884	1.17 (1.05, 1.31)	115.93 (128.46, 104.55)	99.62 (89.76, 110.5)	16.31 (5.43, 26.17)
Serum chloride	Lower than	98	mmol/L	0.274363	1.07 (0.95, 1.22)	75.73 (85.52, 67.03)	70.75 (62.6, 79.92)	4.98 (-4.19, 13.14)
Serum Creatinine	Higher than	1.5	mg/dL	0.822022	0.98 (0.85, 1.14)	60.87 (69.96, 52.92)	61.85 (53.78, 71.09)	-0.98 (-10.22, 7.09)
Serum Creatinine	Lower than	0.5	mg/dL	0.000122643	1.88 (1.36, 2.6)	10.49 (14.46, 7.61)	5.59 (4.05, 7.71)	4.9 (2.78, 6.44)
Serum phosphate	Higher than	4.9	mg/dL	1.17412e-05	1.47 (1.24, 1.74)	38.91 (46.01, 32.88)	26.68 (22.53, 31.6)	12.22 (7.31, 16.38)
Serum phosphate	Lower than	2.5	mg/dL	0.000526496	1.3 (1.12, 1.5)	52.49 (60.49, 45.52)	40.79 (35.35, 47.05)	11.7 (5.44, 17.15)
Serum potassium	Higher than	5.1	mmol/L	0.784472	1.02 (0.88, 1.19)	49.75 (57.51, 43.01)	48.75 (42.15, 56.36)	1 (-6.61, 7.61)
Serum potassium	Lower than	3.5	mmol/L	5.16097e-06	1.31 (1.17, 1.47)	95.62 (106.76, 85.59)	73.83 (66, 82.55)	21.79 (13.08, 29.62)
Serum sodium	Higher than	145	mmol/L	3.9903e-06	1.49 (1.26, 1.77)	36.32 (42.91, 30.73)	24.5 (20.71, 28.97)	11.83 (7.35, 15.62)
Serum sodium	Lower than	136	mmol/L	0.00220879	1.18 (1.06, 1.32)	129.88 (143.48, 117.47)	111 (100.29, 122.77)	18.88 (7.11, 29.58)
Serum total protein	Higher than	8.5	g/dL	0.351205	0.87 (0.66, 1.16)	12.85 (17.08, 9.67)	14.72 (11.07, 19.55)	-1.86 (-6.69, 1.78)
Serum total protein	Lower than	6	g/dL	2.01713e-19	1.81 (1.59, 2.06)	76.39 (86.42, 67.47)	42.99 (37.9, 48.76)	33.39 (27.63, 38.49)
Total bilirubin	Higher than	1.2	mg/dL	0.291474	1.09 (0.93, 1.29)	39.01 (45.75, 33.25)	35.8 (30.5, 41.99)	3.21 (-2.98, 8.51)
Total bilirubin	Lower than	0.2	mg/dL	0.0774841	1.36 (0.97, 1.91)	9.77 (13.69, 6.96)	7.2 (5.13, 10.1)	2.57 (-0.33, 4.64)
Total Cholesterol	Higher than	200	mg/dL	4.96717e-05	1.4 (1.19, 1.65)	47.25 (55.34, 40.32)	34 (28.98, 39.87)	13.25 (7.38, 18.27)
Total white blood cell count	Higher than	10.8	K/cmm	0.00129048	1.19 (1.07, 1.32)	116.95 (128.94, 106.02)	99.51 (90.12, 109.82)	17.44 (7.14, 26.83)
Total white blood cell count	Lower than	4.8	K/cmm	0.672579	1.03 (0.9, 1.18)	67.35 (76.72, 59.09)	65.48 (57.45, 74.6)	1.87 (-7.25, 9.91)
Triglycerides	Higher than	150	mg/dL	0.00805367	1.2 (1.05, 1.37)	77.39 (87.85, 68.13)	65.13 (57.29, 74)	12.26 (3.39, 20.1)
Troponin I	Higher than	0.4	ng/mL	0.984043	1 (0.72, 1.38)	8.91 (12.29, 6.45)	8.94 (6.48, 12.34)	-0.03 (-3.43, 2.43)
Troponin T	Higher than	0.4	ng/mL	4.06829e-06	3.2 (1.95, 5.24)	6.46 (10.58, 3.95)	2.03 (1.24, 3.32)	4.44 (3.15, 5.23)
