# Supplementary material for: High Dimensional Characterization of Post-acute Sequalae of COVID-19: analysis of health outcomes and clinical manifestations at 6 months
Source: Research Square preprint supplement (doi:10.21203/rs.3.rs-150398/v1), 2021-01-21
Supplement: Supplementary file 8 [file 3682359a418fa85cbddb0704.xlsx]

## Sheet: Hospitalized COVID vs FLU ICD10
Supplementary information table 4: Identification of the post-acute incident diagnoses in people who had been hospitalized with COVID-19 vs. those who had been hospitalized with seasonal influenza
People who had been hospitalized with seasonal influenza served as the referent category
Model based on survival models adjusted through overlap weighting
Outcomes were ascertained from day 30 after hospital admission until end of follow-up
Diagnoses with less than 10 events in either group were not modelled
A P value of less than 6.57*10^-5 was considered statistically significant
Diagnosis group	Diagnosis	P value	Hazard ratio (95% Confidence interval)	Incident rate per 1000 at 6-months in hospitalized COVID-19 (95% confidence interval)	Incident rate per 1000 at 6-months in hospitalized seasonal influenza (95% confidence interval)	Excess burden per 1000 hospitalized COVID-19 patients at 6-months (95% confidence interval)
Diseases of the Blood and Blood Forming Organs and Certain Disorders Involving the Immune Mechanism	Nutritional anemia	0.0020619	1.24 (1.08, 1.43)	65.01 (74.25, 56.89)	52.69 (46.07, 60.23)	12.32 (4.78, 18.95)
Diseases of the Blood and Blood Forming Organs and Certain Disorders Involving the Immune Mechanism	Hemolytic anemia	1	1 (0.53, 1.89)	2.62 (4.92, 1.39)	2.61 (1.39, 4.92)	0 (-2.3, 1.23)
Diseases of the Blood and Blood Forming Organs and Certain Disorders Involving the Immune Mechanism	Aplastic anemia	4.32158e-08	1.36 (1.22, 1.51)	112.17 (124.21, 101.23)	84.08 (75.76, 93.26)	28.09 (18.91, 36.41)
Diseases of the Blood and Blood Forming Organs and Certain Disorders Involving the Immune Mechanism	Acute posthemorrhagic anemia	8.49504e-05	1.6 (1.27, 2.02)	19.7 (24.82, 15.63)	12.38 (9.81, 15.61)	7.32 (4.09, 9.89)
Diseases of the Blood and Blood Forming Organs and Certain Disorders Involving the Immune Mechanism	Sickle cell trait/anemia
Diseases of the Blood and Blood Forming Organs and Certain Disorders Involving the Immune Mechanism	Coagulation and hemorrhagic disorders	1.36051e-07	1.58 (1.33, 1.87)	39.46 (46.57, 33.42)	25.21 (21.33, 29.8)	14.25 (9.67, 18.13)
Diseases of the Blood and Blood Forming Organs and Certain Disorders Involving the Immune Mechanism	Diseases of white blood cells	0.000608106	1.33 (1.13, 1.56)	41.79 (48.96, 35.65)	31.64 (26.97, 37.1)	10.15 (4.69, 14.82)
Diseases of the Blood and Blood Forming Organs and Certain Disorders Involving the Immune Mechanism	Immunity disorders	0.35854	0.8 (0.49, 1.29)	3.45 (5.57, 2.14)	4.32 (2.67, 6.97)	-0.87 (-3.52, 0.78)
Diseases of the Blood and Blood Forming Organs and Certain Disorders Involving the Immune Mechanism	Postprocedural or postoperative complications of the spleen
Diseases of the Blood and Blood Forming Organs and Certain Disorders Involving the Immune Mechanism	Other specified and unspecified hematologic conditions	0.393305	1.23 (0.76, 1.98)	3.62 (5.83, 2.25)	2.94 (1.83, 4.74)	0.68 (-1.12, 1.79)
Diseases of the Circulatory System	Chronic rheumatic heart disease	0.749087	0.94 (0.65, 1.36)	7.45 (10.78, 5.15)	7.92 (5.47, 11.45)	-0.46 (-4, 1.98)
Diseases of the Circulatory System	Acute rheumatic heart disease
Diseases of the Circulatory System	Nonrheumatic and unspecified valve disorders	0.0134146	0.74 (0.59, 0.94)	15.52 (19.62, 12.27)	20.86 (16.5, 26.35)	-5.34 (-10.83, -0.98)
Diseases of the Circulatory System	Endocarditis and endocardial disease	0.046293	1.6 (1.01, 2.55)	5.29 (8.41, 3.33)	3.31 (2.08, 5.25)	1.99 (0.04, 3.21)
Diseases of the Circulatory System	Myocarditis and cardiomyopathy	0.0118258	0.77 (0.63, 0.94)	23.78 (29.12, 19.4)	30.85 (25.19, 37.75)	-7.07 (-13.97, -1.41)
Diseases of the Circulatory System	Pericarditis and pericardial disease	0.0963648	1.4 (0.94, 2.08)	7.15 (10.62, 4.81)	5.11 (3.44, 7.59)	2.04 (-0.44, 3.71)
Diseases of the Circulatory System	Essential hypertension	0.0293358	1.16 (1.02, 1.32)	196.08 (220.04, 174.43)	172.15 (152.89, 193.55)	23.93 (2.53, 43.2)
Diseases of the Circulatory System	Hypertension with complications and secondary hypertension	8.96335e-05	1.25 (1.12, 1.39)	106.47 (118.1, 95.92)	86.38 (77.73, 95.93)	20.09 (10.53, 28.73)
Diseases of the Circulatory System	Acute myocardial infarction	0.131594	1.17 (0.96, 1.43)	24.81 (30.25, 20.35)	21.3 (17.46, 25.97)	3.51 (-1.16, 7.36)
Diseases of the Circulatory System	Complications of acute myocardial infarction
Diseases of the Circulatory System	Coronary atherosclerosis and other heart disease	0.388096	0.94 (0.83, 1.08)	75.29 (85.56, 66.21)	79.65 (70.07, 90.49)	-4.37 (-15.2, 5.22)
Diseases of the Circulatory System	Nonspecific chest pain	0.706005	1.03 (0.9, 1.18)	63.84 (72.82, 55.93)	62.24 (54.52, 71)	1.6 (-7.16, 9.32)
Diseases of the Circulatory System	Acute pulmonary embolism	1.14587e-14	2.57 (2.02, 3.26)	25.23 (31.94, 19.91)	9.9 (7.8, 12.56)	15.33 (12.67, 17.43)
Diseases of the Circulatory System	Pulmonary heart disease	0.146627	0.85 (0.68, 1.06)	20.33 (25.25, 16.36)	23.87 (19.22, 29.64)	-3.54 (-9.31, 1.11)
Diseases of the Circulatory System	Other and ill-defined heart disease	0.408316	0.89 (0.67, 1.18)	12.56 (16.56, 9.53)	14.12 (10.71, 18.61)	-1.55 (-6.05, 1.86)
Diseases of the Circulatory System	Conduction disorders	0.614133	1.05 (0.87, 1.27)	27.84 (33.58, 23.08)	26.53 (21.99, 32)	1.31 (-4.16, 5.86)
Diseases of the Circulatory System	Cardiac dysrhythmias	0.140964	1.1 (0.97, 1.23)	85.89 (96.32, 76.54)	78.77 (70.17, 88.38)	7.12 (-2.49, 15.72)
Diseases of the Circulatory System	Cardiac arrest and ventricular fibrillation	0.00606597	1.65 (1.15, 2.37)	8.12 (11.6, 5.68)	4.92 (3.44, 7.03)	3.2 (1.08, 4.68)
Diseases of the Circulatory System	Heart failure	0.2063	0.92 (0.81, 1.05)	69.21 (78.43, 61.04)	75.03 (66.19, 84.99)	-5.82 (-15.78, 3.02)
Diseases of the Circulatory System	Cerebral infarction	0.00646212	1.38 (1.1, 1.75)	20.61 (25.94, 16.36)	14.95 (11.86, 18.84)	5.66 (1.77, 8.75)
Diseases of the Circulatory System	Acute hemorrhagic cerebrovascular disease	0.141755	1.49 (0.88, 2.52)	3.55 (6.02, 2.1)	2.39 (1.41, 4.06)	1.16 (-0.5, 2.14)
Diseases of the Circulatory System	Sequela of hemorrhagic cerebrovascular disease	0.420972	1.39 (0.62, 3.1)	1.64 (3.65, 0.74)	1.18 (0.53, 2.63)	0.46 (-0.99, 1.11)
Diseases of the Circulatory System	Occlusion or stenosis of precerebral or cerebral arteries without infarction	0.642645	0.92 (0.64, 1.32)	7.3 (10.51, 5.07)	7.96 (5.52, 11.45)	-0.66 (-4.15, 1.77)
Diseases of the Circulatory System	Other and ill-defined cerebrovascular disease	0.760023	0.96 (0.72, 1.27)	12.7 (16.81, 9.59)	13.27 (10.02, 17.56)	-0.57 (-4.86, 2.68)
Diseases of the Circulatory System	Sequela of cerebral infarction and other cerebrovascular disease	0.0584968	1.24 (0.99, 1.55)	21.3 (26.52, 17.09)	17.23 (13.82, 21.46)	4.07 (-0.16, 7.48)
Diseases of the Circulatory System	Peripheral and visceral vascular disease	0.963449	1 (0.84, 1.2)	35.35 (42.01, 29.72)	35.2 (29.6, 41.84)	0.14 (-6.49, 5.74)
Diseases of the Circulatory System	Arterial dissections
Diseases of the Circulatory System	Gangrene	0.0150168	1.53 (1.09, 2.16)	8.52 (11.99, 6.05)	5.57 (3.95, 7.84)	2.95 (0.67, 4.57)
Diseases of the Circulatory System	Aortic; peripheral; and visceral artery aneurysms	0.343131	0.86 (0.62, 1.18)	9.11 (12.52, 6.62)	10.63 (7.72, 14.61)	-1.52 (-5.5, 1.38)
Diseases of the Circulatory System	Aortic and peripheral arterial embolism or thrombosis	0.903498	1.04 (0.59, 1.83)	2.69 (4.75, 1.52)	2.6 (1.47, 4.58)	0.09 (-1.89, 1.22)
Diseases of the Circulatory System	Hypotension	1.49418e-07	1.43 (1.25, 1.64)	64.66 (73.6, 56.77)	45.57 (39.96, 51.94)	19.09 (12.71, 24.7)
Diseases of the Circulatory System	Other specified and unspecified circulatory disease	0.00110202	1.42 (1.15, 1.76)	23.86 (29.41, 19.36)	16.84 (13.65, 20.76)	7.03 (3.1, 10.22)
Diseases of the Circulatory System	Acute phlebitis; thrombophlebitis and thromboembolism	2.56619e-07	1.71 (1.39, 2.09)	28.96 (35.37, 23.7)	17.07 (13.96, 20.88)	11.88 (8.08, 15)
Diseases of the Circulatory System	Chronic phlebitis; thrombophlebitis and thromboembolism	0.00034076	1.84 (1.32, 2.57)	11.37 (15.83, 8.16)	6.2 (4.45, 8.64)	5.17 (2.73, 6.92)
Diseases of the Circulatory System	Varicose veins of lower extremity	1	1 (0.56, 1.78)	3.39 (6.03, 1.9)	3.4 (1.91, 6.05)	-0.01 (-2.66, 1.48)
Diseases of the Circulatory System	Postthrombotic syndrome and venous insufficiency/hypertension	0.035133	0.75 (0.58, 0.98)	12.89 (16.77, 9.91)	17.1 (13.15, 22.23)	-4.21 (-9.33, -0.26)
Diseases of the Circulatory System	Vasculitis	0.524262	1.32 (0.57, 3.06)	1.96 (4.57, 0.84)	1.49 (0.64, 3.47)	0.47 (-1.51, 1.32)
Diseases of the Circulatory System	Postprocedural or postoperative circulatory system complication	0.163322	1.49 (0.85, 2.62)	3.85 (6.75, 2.19)	2.58 (1.47, 4.53)	1.27 (-0.68, 2.38)
Diseases of the Circulatory System	Other specified diseases of veins and lymphatics	0.805393	1.04 (0.76, 1.42)	10.65 (14.5, 7.82)	10.25 (7.52, 13.95)	0.41 (-3.3, 3.13)
Diseases of the Digestive System	Intestinal infection	0.302373	0.87 (0.67, 1.14)	13.02 (16.98, 9.98)	14.98 (11.48, 19.52)	-1.95 (-6.5, 1.54)
Diseases of the Digestive System	Disorders of teeth and gingiva	0.00195193	0.75 (0.63, 0.9)	36.28 (43.23, 30.43)	47.84 (40.17, 56.94)	-11.56 (-20.66, -3.89)
Diseases of the Digestive System	Diseases of mouth; excluding dental	0.309338	1.15 (0.88, 1.52)	14.52 (19.06, 11.05)	12.6 (9.59, 16.55)	1.91 (-2.03, 4.92)
Diseases of the Digestive System	Esophageal disorders	0.00100247	1.22 (1.08, 1.37)	108.52 (121.1, 97.18)	90.13 (80.62, 100.7)	18.39 (7.83, 27.9)
Diseases of the Digestive System	Gastroduodenal ulcer	0.825165	1.05 (0.7, 1.55)	7.09 (10.51, 4.79)	6.79 (4.58, 10.06)	0.31 (-2.96, 2.52)
Diseases of the Digestive System	Gastrointestinal and biliary perforation	0.38537	0.77 (0.42, 1.39)	2.82 (5.1, 1.56)	3.67 (2.03, 6.64)	-0.85 (-3.82, 0.79)
Diseases of the Digestive System	Gastritis and duodenitis	0.339399	0.87 (0.65, 1.16)	11.91 (15.81, 8.96)	13.67 (10.29, 18.15)	-1.77 (-6.24, 1.61)
Diseases of the Digestive System	Other specified and unspecified disorders of stomach and duodenum	0.545303	1.09 (0.82, 1.44)	13.97 (18.46, 10.57)	12.82 (9.7, 16.94)	1.15 (-2.97, 4.27)
Diseases of the Digestive System	Appendicitis and other appendiceal conditions
Diseases of the Digestive System	Abdominal hernia	0.934279	1.01 (0.8, 1.27)	19.26 (24.18, 15.33)	19.07 (15.18, 23.95)	0.18 (-4.7, 4.08)
Diseases of the Digestive System	Regional enteritis and ulcerative colitis	0.381085	0.78 (0.44, 1.37)	2.99 (5.27, 1.69)	3.85 (2.18, 6.78)	-0.86 (-3.79, 0.8)
Diseases of the Digestive System	Intestinal obstruction and ileus	0.5147	1.1 (0.82, 1.48)	11.88 (15.94, 8.85)	10.77 (8.02, 14.45)	1.11 (-2.58, 3.86)
Diseases of the Digestive System	Diverticulosis and diverticulitis	0.076104	0.81 (0.65, 1.02)	16.48 (20.71, 13.11)	20.26 (16.13, 25.45)	-3.78 (-8.97, 0.35)
Diseases of the Digestive System	Hemorrhoids	0.0863038	0.81 (0.64, 1.03)	14.46 (18.35, 11.39)	17.81 (14.03, 22.6)	-3.35 (-8.14, 0.42)
Diseases of the Digestive System	Anal and rectal conditions	0.551072	0.89 (0.61, 1.3)	6.68 (9.74, 4.58)	7.49 (5.14, 10.92)	-0.81 (-4.24, 1.54)
Diseases of the Digestive System	Peritonitis and intra-abdominal abscess	0.595263	0.89 (0.59, 1.35)	5.04 (7.6, 3.34)	5.64 (3.74, 8.5)	-0.59 (-3.46, 1.31)
Diseases of the Digestive System	Biliary tract disease	0.609297	1.07 (0.82, 1.4)	14.88 (19.37, 11.43)	13.89 (10.67, 18.09)	0.99 (-3.2, 4.22)
Diseases of the Digestive System	Hepatic failure	0.631153	1.1 (0.76, 1.59)	6.87 (9.93, 4.75)	6.28 (4.34, 9.08)	0.59 (-2.2, 2.53)
Diseases of the Digestive System	Other specified and unspecified liver disease	0.0511334	0.8 (0.64, 1)	19.19 (23.98, 15.35)	23.95 (19.17, 29.91)	-4.76 (-10.73, 0.02)
Diseases of the Digestive System	Pancreatic disorders (excluding diabetes)	0.779067	0.95 (0.66, 1.37)	6.06 (8.71, 4.21)	6.38 (4.44, 9.18)	-0.32 (-3.12, 1.62)
Diseases of the Digestive System	Gastrointestinal hemorrhage	0.010179	1.26 (1.06, 1.51)	32.94 (39.2, 27.66)	26.2 (21.99, 31.2)	6.74 (1.74, 10.95)
Diseases of the Digestive System	Noninfectious gastroenteritis	0.14079	0.77 (0.54, 1.09)	7.45 (10.55, 5.26)	9.67 (6.83, 13.7)	-2.23 (-6.25, 0.62)
Diseases of the Digestive System	Noninfectious hepatitis	0.268694	0.73 (0.42, 1.28)	3.09 (5.39, 1.77)	4.23 (2.42, 7.38)	-1.14 (-4.29, 0.67)
Diseases of the Digestive System	Postprocedural or postoperative digestive system complication	0.701806	1.1 (0.68, 1.78)	3.93 (6.36, 2.42)	3.57 (2.2, 5.79)	0.35 (-1.86, 1.72)
Diseases of the Digestive System	Other specified and unspecified gastrointestinal disorders	2.88034e-05	1.29 (1.14, 1.45)	84.83 (94.98, 75.72)	66.52 (59.31, 74.57)	18.31 (10.26, 25.52)
Diseases of the Ear and Mastoid Process	Otitis media	0.0270315	0.56 (0.33, 0.94)	3.1 (5.2, 1.85)	5.55 (3.31, 9.29)	-2.45 (-6.19, -0.21)
Diseases of the Ear and Mastoid Process	Diseases of middle ear and mastoid (except otitis media)	0.0213597	0.52 (0.3, 0.91)	2.54 (4.45, 1.45)	4.9 (2.8, 8.58)	-2.36 (-6.04, -0.26)
Diseases of the Ear and Mastoid Process	Diseases of inner ear and related conditions	0.65199	0.91 (0.61, 1.36)	5.64 (8.4, 3.79)	6.19 (4.15, 9.21)	-0.54 (-3.57, 1.49)
Diseases of the Ear and Mastoid Process	Hearing loss	0.148256	0.89 (0.76, 1.04)	44.5 (52.1, 37.98)	49.99 (42.69, 58.5)	-5.49 (-14, 1.81)
Diseases of the Ear and Mastoid Process	Postprocedural or postoperative ear and/or mastoid process complication
Diseases of the Ear and Mastoid Process	Other specified and unspecified disorders of the ear	0.0293307	0.82 (0.69, 0.98)	32.94 (39.14, 27.71)	39.9 (33.58, 47.37)	-6.96 (-14.43, -0.64)
Endocrine, Nutritional and Metabolic Diseases	Thyroid disorders	0.780714	1.03 (0.84, 1.26)	27.89 (33.98, 22.88)	27.12 (22.24, 33.04)	0.77 (-5.15, 5.65)
Endocrine, Nutritional and Metabolic Diseases	Diabetes mellitus without complication	0.0304412	1.18 (1.02, 1.37)	72.32 (83.51, 62.58)	61.64 (53.29, 71.24)	10.68 (1.08, 19.03)
Endocrine, Nutritional and Metabolic Diseases	Diabetes mellitus with complication	0.0743215	1.15 (0.99, 1.34)	62.46 (72.4, 53.84)	54.56 (47.01, 63.29)	7.89 (-0.83, 15.45)
Endocrine, Nutritional and Metabolic Diseases	Diabetes mellitus, Type 1	0.226263	0.77 (0.51, 1.17)	5.52 (8.35, 3.65)	7.13 (4.71, 10.76)	-1.6 (-5.24, 0.81)
Endocrine, Nutritional and Metabolic Diseases	Diabetes mellitus, Type 2	0.0511975	1.19 (1, 1.43)	58.38 (69.37, 49.09)	49.13 (41.28, 58.43)	9.25 (-0.05, 17.1)
Endocrine, Nutritional and Metabolic Diseases	Diabetes mellitus, due to underlying condition, drug or chemical induced, or other specified type	0.224354	0.85 (0.65, 1.11)	12.85 (16.71, 9.87)	15.12 (11.63, 19.66)	-2.27 (-6.81, 1.22)
Endocrine, Nutritional and Metabolic Diseases	Nutritional deficiencies	0.359111	1.07 (0.93, 1.22)	63.79 (72.58, 56.03)	60.04 (52.72, 68.33)	3.75 (-4.54, 11.07)
Endocrine, Nutritional and Metabolic Diseases	Malnutrition	9.07494e-17	1.93 (1.65, 2.25)	52.04 (60.45, 44.77)	27.39 (23.52, 31.88)	24.65 (20.16, 28.52)
Endocrine, Nutritional and Metabolic Diseases	Obesity	0.015062	1.2 (1.04, 1.39)	55.18 (63.62, 47.83)	46.21 (40.04, 53.32)	8.97 (1.86, 15.14)
Endocrine, Nutritional and Metabolic Diseases	Disorders of lipid metabolism	1.08804e-06	1.32 (1.18, 1.47)	194.56 (214.77, 176.04)	151.4 (136.63, 167.6)	43.17 (26.97, 57.93)
Endocrine, Nutritional and Metabolic Diseases	Fluid and electrolyte disorders	1.99556e-21	1.58 (1.44, 1.74)	150.14 (163.78, 137.54)	97.62 (89.19, 106.79)	52.52 (43.35, 60.94)
Endocrine, Nutritional and Metabolic Diseases	Cystic fibrosis
Endocrine, Nutritional and Metabolic Diseases	Pituitary disorders	0.0249753	1.82 (1.08, 3.08)	4.05 (6.83, 2.4)	2.22 (1.31, 3.75)	1.82 (0.29, 2.73)
Endocrine, Nutritional and Metabolic Diseases	Postprocedural or postoperative endocrine or metabolic complication	0.585391	1.21 (0.61, 2.41)	2.03 (4.03, 1.02)	1.68 (0.84, 3.33)	0.35 (-1.3, 1.19)
Endocrine, Nutritional and Metabolic Diseases	Other specified and unspecified endocrine disorders	0.530884	1.08 (0.86, 1.35)	20.19 (25.26, 16.13)	18.79 (15.01, 23.52)	1.4 (-3.32, 5.18)
Endocrine, Nutritional and Metabolic Diseases	Other specified and unspecified nutritional and metabolic disorders	3.65242e-09	1.48 (1.3, 1.69)	71.4 (80.97, 62.92)	48.72 (42.87, 55.35)	22.68 (16.05, 28.53)
Endocrine, Nutritional and Metabolic Diseases	Sequela of malnutrition and other nutritional deficiencies
Diseases of the Eye and Adnexa	Cornea and external disease	0.0074747	0.76 (0.63, 0.93)	25.58 (31.08, 21.05)	33.36 (27.46, 40.49)	-7.78 (-14.91, -1.88)
Diseases of the Eye and Adnexa	Cataract and other lens disorders	0.0484647	0.87 (0.76, 1)	67.71 (77.27, 59.3)	77.34 (67.77, 88.2)	-9.63 (-20.48, -0.06)
Diseases of the Eye and Adnexa	Glaucoma	0.197549	0.87 (0.7, 1.08)	24 (29.76, 19.34)	27.65 (22.29, 34.27)	-3.65 (-10.27, 1.71)
Diseases of the Eye and Adnexa	Uveitis and ocular inflammation	0.307148	1.45 (0.71, 2.98)	2.26 (4.62, 1.1)	1.55 (0.76, 3.18)	0.7 (-0.92, 1.5)
Diseases of the Eye and Adnexa	Retinal and vitreous conditions	0.622981	0.96 (0.82, 1.13)	47.53 (55.59, 40.61)	49.44 (42.25, 57.81)	-1.91 (-10.28, 5.28)
Diseases of the Eye and Adnexa	Neuro-ophthalmology	0.13671	0.69 (0.43, 1.12)	4.34 (7.01, 2.68)	6.24 (3.86, 10.08)	-1.91 (-5.75, 0.47)
Diseases of the Eye and Adnexa	Strabismus	0.317916	0.78 (0.47, 1.28)	3 (4.92, 1.83)	3.86 (2.35, 6.33)	-0.86 (-3.33, 0.65)
Diseases of the Eye and Adnexa	Oculofacial plastics and orbital conditions	0.238574	0.91 (0.77, 1.07)	38.7 (45.46, 32.93)	42.64 (36.29, 50.07)	-3.94 (-11.37, 2.41)
Diseases of the Eye and Adnexa	Refractive error	9.44175e-08	0.71 (0.62, 0.8)	72.82 (82.39, 64.32)	101.75 (90.04, 114.88)	-28.93 (-42.07, -17.23)
Diseases of the Eye and Adnexa	Blindness and vision defects	0.228207	0.87 (0.7, 1.09)	19.37 (24.21, 15.49)	22.22 (17.77, 27.77)	-2.85 (-8.39, 1.6)
Diseases of the Eye and Adnexa	Postprocedural or postoperative eye complication
Diseases of the Eye and Adnexa	Other specified eye disorders	0.988717	1 (0.71, 1.42)	8.85 (12.48, 6.27)	8.82 (6.25, 12.45)	0.02 (-3.6, 2.6)
Factors Influencing Health Status and Contact with Health Services	Encounter for administrative purposes	0.000300689	0.76 (0.65, 0.88)	44.81 (51.96, 38.62)	58.86 (50.78, 68.18)	-14.06 (-23.38, -5.97)
Factors Influencing Health Status and Contact with Health Services	Encounter for mental health services related to abuse
Factors Influencing Health Status and Contact with Health Services	Encounter for observation and examination for conditions ruled out (excludes infectious disease, neoplasm, mental disorders)	0.0531181	0.91 (0.82, 1)	173.52 (189.84, 158.47)	189.61 (173.31, 207.24)	-16.09 (-33.72, 0.21)
Factors Influencing Health Status and Contact with Health Services	Encounter for prophylactic or other procedures	0.110357	2.19 (0.84, 5.71)	1.3 (3.38, 0.5)	0.59 (0.23, 1.55)	0.7 (-0.25, 1.07)
Factors Influencing Health Status and Contact with Health Services	Encounter for prophylactic measures (excludes immunization)
Factors Influencing Health Status and Contact with Health Services	Encounter for antineoplastic therapies	0.0863573	0.71 (0.48, 1.05)	6.01 (8.91, 4.04)	8.49 (5.72, 12.59)	-2.48 (-6.58, 0.29)
Factors Influencing Health Status and Contact with Health Services	Encounter for mental health conditions	3.04244e-09	5.88 (3.27, 10.56)	5.06 (9.07, 2.82)	0.86 (0.48, 1.55)	4.2 (3.51, 4.58)
Factors Influencing Health Status and Contact with Health Services	Neoplasm-related encounters	0.373496	0.92 (0.78, 1.1)	33.74 (40.08, 28.4)	36.49 (30.71, 43.32)	-2.74 (-9.58, 3.03)
Factors Influencing Health Status and Contact with Health Services	Implant, device or graft related encounter	0.013816	0.87 (0.78, 0.97)	116.31 (129.31, 104.54)	132.85 (119.52, 147.55)	-16.54 (-31.23, -3.21)
Factors Influencing Health Status and Contact with Health Services	Other aftercare encounter	7.9069e-11	1.33 (1.22, 1.45)	233.75 (251.7, 216.9)	181.81 (168.29, 196.29)	51.94 (37.46, 65.47)
Factors Influencing Health Status and Contact with Health Services	Counseling related to sexual behavior or orientation
Factors Influencing Health Status and Contact with Health Services	Other specified encounters and counseling	4.22085e-05	1.26 (1.13, 1.41)	490.73 (529.78, 453.08)	413.92 (379.87, 449.79)	76.81 (40.94, 110.87)
Factors Influencing Health Status and Contact with Health Services	Contraceptive and procreative management
Factors Influencing Health Status and Contact with Health Services	Medical examination/evaluation	0.140033	0.92 (0.82, 1.03)	109.17 (121.59, 97.94)	118.4 (106.29, 131.8)	-9.24 (-22.63, 2.88)
Factors Influencing Health Status and Contact with Health Services	Resistance to antimicrobial drugs	0.00270053	2.05 (1.28, 3.28)	6.42 (10.25, 4.02)	3.14 (1.96, 5.01)	3.28 (1.41, 4.46)
Factors Influencing Health Status and Contact with Health Services	Exposure, encounters, screening or contact with infectious disease	1.43934e-74	2.47 (2.24, 2.72)	248.01 (269.48, 227.97)	109.19 (99.64, 119.59)	138.82 (128.41, 148.37)
Factors Influencing Health Status and Contact with Health Services	No immunization or underimmunization	0.0254898	2.03 (1.09, 3.78)	2.14 (3.97, 1.15)	1.05 (0.56, 1.96)	1.08 (0.18, 1.57)
Factors Influencing Health Status and Contact with Health Services	Screening for neurocognitive or neurodevelopmental condition
Factors Influencing Health Status and Contact with Health Services	Socioeconomic/psychosocial factors	6.84231e-10	1.37 (1.24, 1.51)	168.71 (184.57, 154.08)	126.49 (115.27, 138.72)	42.22 (29.99, 53.44)
Factors Influencing Health Status and Contact with Health Services	Lifestyle/life management factors	0.14006	0.88 (0.75, 1.04)	41.13 (48.34, 34.97)	46.45 (39.51, 54.57)	-5.32 (-13.45, 1.61)
Factors Influencing Health Status and Contact with Health Services	Personal/family history of disease	9.15042e-16	1.44 (1.32, 1.57)	228.04 (246.32, 210.92)	164.74 (151.9, 178.55)	63.3 (49.5, 76.14)
Factors Influencing Health Status and Contact with Health Services	Acquired absence of limb or organ	0.409036	0.91 (0.72, 1.14)	15.99 (20.13, 12.7)	17.62 (14, 22.18)	-1.63 (-6.18, 2)
Factors Influencing Health Status and Contact with Health Services	Organ transplant status	0.378798	0.74 (0.38, 1.44)	2.25 (4.37, 1.16)	3.03 (1.56, 5.9)	-0.78 (-3.65, 0.69)
Factors Influencing Health Status and Contact with Health Services	Carrier status	0.1107	0.7 (0.45, 1.09)	4.28 (6.67, 2.74)	6.14 (3.94, 9.58)	-1.86 (-5.3, 0.34)
Factors Influencing Health Status and Contact with Health Services	Other specified status	7.30709e-09	1.29 (1.18, 1.41)	299.25 (321.43, 278.26)	240.73 (223.18, 259.41)	58.52 (39.83, 76.07)
Diseases of the Genitourinary System	Nephritis; nephrosis; renal sclerosis	0.580021	0.93 (0.71, 1.22)	13.14 (17.23, 10.02)	14.19 (10.82, 18.6)	-1.04 (-5.45, 2.32)
Diseases of the Genitourinary System	Acute and unspecified renal failure	7.27479e-16	1.56 (1.4, 1.74)	105.94 (117.25, 95.65)	69.34 (62.49, 76.92)	36.59 (29.01, 43.45)
Diseases of the Genitourinary System	Chronic kidney disease	0.0665552	1.14 (0.99, 1.3)	64.05 (73.11, 56.09)	56.57 (49.51, 64.6)	7.49 (-0.54, 14.55)
Diseases of the Genitourinary System	Urinary tract infections	1.05419e-13	1.65 (1.44, 1.88)	70.31 (79.77, 61.93)	43.33 (38.1, 49.26)	26.97 (21.04, 32.2)
Diseases of the Genitourinary System	Calculus of urinary tract	0.534992	1.1 (0.82, 1.46)	12.33 (16.43, 9.25)	11.26 (8.44, 15)	1.07 (-2.67, 3.89)
Diseases of the Genitourinary System	Other specified and unspecified diseases of kidney and ureters	0.196366	1.12 (0.94, 1.33)	35.3 (41.86, 29.76)	31.54 (26.58, 37.41)	3.76 (-2.11, 8.72)
Diseases of the Genitourinary System	Other specified and unspecified diseases of bladder and urethra	0.374342	0.9 (0.7, 1.14)	16.05 (20.47, 12.58)	17.92 (14.05, 22.85)	-1.87 (-6.8, 2)
Diseases of the Genitourinary System	Urinary incontinence	0.0907793	1.21 (0.97, 1.51)	22.04 (27.42, 17.72)	18.26 (14.67, 22.71)	3.79 (-0.67, 7.38)
Diseases of the Genitourinary System	Hematuria	0.136578	1.14 (0.96, 1.36)	34.86 (41.4, 29.33)	30.57 (25.72, 36.33)	4.28 (-1.48, 9.14)
Diseases of the Genitourinary System	Proteinuria	0.185927	1.31 (0.88, 1.94)	6.8 (10.07, 4.59)	5.22 (3.52, 7.73)	1.58 (-0.93, 3.28)
Diseases of the Genitourinary System	Vesicoureteral reflux
Diseases of the Genitourinary System	Hyperplasia of prostate	0.000116655	1.27 (1.12, 1.43)	91 (101.98, 81.15)	72.61 (64.68, 81.47)	18.39 (9.53, 26.32)
Diseases of the Genitourinary System	Inflammatory conditions of male genital organs	0.265529	1.21 (0.87, 1.69)	7.62 (10.65, 5.45)	6.3 (4.51, 8.81)	1.32 (-1.19, 3.12)
Diseases of the Genitourinary System	Erectile dysfunction	0.775678	1.03 (0.83, 1.29)	19.26 (23.94, 15.49)	18.66 (15, 23.2)	0.6 (-3.94, 4.26)
Diseases of the Genitourinary System	Male infertility
Diseases of the Genitourinary System	Other specified male genital disorders	0.31316	0.86 (0.65, 1.15)	12.12 (16.09, 9.12)	14.02 (10.56, 18.61)	-1.9 (-6.49, 1.56)
Diseases of the Genitourinary System	Nonmalignant breast conditions	0.0842004	1.55 (0.94, 2.56)	3.84 (6.33, 2.33)	2.47 (1.5, 4.07)	1.37 (-0.24, 2.34)
Diseases of the Genitourinary System	Inflammatory diseases of female pelvic organs	0.992021	1 (0.44, 2.32)	1.02 (2.34, 0.44)	1.01 (0.44, 2.33)	0 (-1.32, 0.58)
Diseases of the Genitourinary System	Endometriosis
Diseases of the Genitourinary System	Prolapse of female genital organs
Diseases of the Genitourinary System	Menstrual disorders
Diseases of the Genitourinary System	Benign ovarian cyst
Diseases of the Genitourinary System	Menopausal disorders
Diseases of the Genitourinary System	Female infertility
Diseases of the Genitourinary System	Other specified female genital disorders	0.543768	1.2 (0.67, 2.16)	2.92 (5.26, 1.62)	2.43 (1.35, 4.38)	0.49 (-1.46, 1.57)
Diseases of the Genitourinary System	Postprocedural or postoperative genitourinary system complication	0.701226	0.88 (0.47, 1.67)	2.02 (3.81, 1.07)	2.29 (1.21, 4.32)	-0.27 (-2.3, 0.81)
Certain Infectious and Parasitic Diseases	Tuberculosis
Certain Infectious and Parasitic Diseases	Septicemia	8.98613e-16	1.74 (1.52, 2)	66.53 (75.81, 58.34)	38.71 (33.88, 44.2)	27.82 (22.33, 32.64)
Certain Infectious and Parasitic Diseases	Bacterial infections	6.83112e-12	1.43 (1.29, 1.59)	116.36 (128.15, 105.59)	82.63 (74.85, 91.17)	33.73 (25.19, 41.52)
Certain Infectious and Parasitic Diseases	Fungal infections	0.848692	1.01 (0.88, 1.17)	61.87 (70.77, 54.06)	61.06 (53.35, 69.85)	0.81 (-7.98, 8.52)
Certain Infectious and Parasitic Diseases	Foodborne intoxications
Certain Infectious and Parasitic Diseases	HIV infection
Certain Infectious and Parasitic Diseases	Hepatitis	0.212737	1.21 (0.9, 1.63)	11.34 (15.24, 8.43)	9.39 (6.98, 12.63)	1.95 (-1.29, 4.36)
Certain Infectious and Parasitic Diseases	Viral infection	0	8.8 (7.92, 9.78)	292.1 (318.87, 267.13)	38.5 (34.7, 42.7)	253.61 (249.4, 257.4)
Certain Infectious and Parasitic Diseases	Parasitic, other specified and unspecified infections	0.290933	1.2 (0.85, 1.7)	8.86 (12.49, 6.28)	7.36 (5.22, 10.38)	1.5 (-1.52, 3.64)
Certain Infectious and Parasitic Diseases	Sexually transmitted infections (excluding HIV and hepatitis)	0.499735	0.86 (0.55, 1.34)	4.67 (7.3, 2.99)	5.45 (3.49, 8.51)	-0.78 (-3.84, 1.19)
Certain Infectious and Parasitic Diseases	Sequela of specified infectious disease conditions
Certain Infectious and Parasitic Diseases	COVID-19	1.93101e-169	154.12 (107.98, 220)	316.86 (419.53, 234.29)	2.47 (1.73, 3.52)	314.39 (313.34, 315.13)
Mental, Behavioral and Neurodevelopmental Disorders	Schizophrenia spectrum and other psychotic disorders	0.677723	1.08 (0.76, 1.52)	10.12 (14.26, 7.17)	9.4 (6.67, 13.26)	0.71 (-3.14, 3.45)
Mental, Behavioral and Neurodevelopmental Disorders	Depressive disorders	0.254067	1.08 (0.95, 1.23)	81.38 (92.24, 71.75)	75.63 (66.66, 85.76)	5.75 (-4.38, 14.72)
Mental, Behavioral and Neurodevelopmental Disorders	Bipolar and related disorders	0.524467	0.88 (0.59, 1.3)	7.26 (10.74, 4.91)	8.25 (5.57, 12.19)	-0.98 (-4.93, 1.69)
Mental, Behavioral and Neurodevelopmental Disorders	Other specified and unspecified mood disorders	0.169394	1.22 (0.92, 1.61)	14.99 (19.81, 11.34)	12.33 (9.32, 16.29)	2.66 (-1.3, 5.67)
Mental, Behavioral and Neurodevelopmental Disorders	Anxiety and fear-related disorders	1.83433e-05	1.37 (1.19, 1.59)	59.3 (68.2, 51.52)	43.58 (37.82, 50.19)	15.72 (9.11, 21.48)
Mental, Behavioral and Neurodevelopmental Disorders	Obsessive-compulsive and related disorders
Mental, Behavioral and Neurodevelopmental Disorders	Trauma- and stressor-related disorders	9.24184e-05	1.34 (1.16, 1.55)	67.87 (78.07, 58.96)	51.22 (44.44, 59)	16.65 (8.87, 23.42)
Mental, Behavioral and Neurodevelopmental Disorders	Disruptive, impulse-control and conduct disorders	0.201427	1.48 (0.81, 2.69)	3.19 (5.8, 1.75)	2.16 (1.19, 3.93)	1.03 (-0.74, 2)
Mental, Behavioral and Neurodevelopmental Disorders	Personality disorders	0.757052	0.95 (0.67, 1.35)	7.91 (11.22, 5.57)	8.36 (5.89, 11.85)	-0.45 (-3.95, 2.02)
Mental, Behavioral and Neurodevelopmental Disorders	Feeding and eating disorders
Mental, Behavioral and Neurodevelopmental Disorders	Somatic disorders	0.2813	1.46 (0.73, 2.89)	2.08 (4.12, 1.05)	1.43 (0.72, 2.83)	0.65 (-0.75, 1.36)
Mental, Behavioral and Neurodevelopmental Disorders	Suicidal ideation/attempt/intentional self-harm	0.428789	1.12 (0.85, 1.49)	12.72 (16.82, 9.61)	11.36 (8.58, 15.03)	1.36 (-2.31, 4.14)
Mental, Behavioral and Neurodevelopmental Disorders	Miscellaneous mental and behavioral disorders/conditions	0.421618	0.9 (0.71, 1.16)	16.29 (20.84, 12.73)	18.02 (14.09, 23.05)	-1.73 (-6.75, 2.21)
Mental, Behavioral and Neurodevelopmental Disorders	Neurodevelopmental disorders	0.732531	1.12 (0.59, 2.14)	2.53 (4.84, 1.32)	2.26 (1.18, 4.32)	0.27 (-1.79, 1.35)
Mental, Behavioral and Neurodevelopmental Disorders	Alcohol-related disorders	4.60295e-05	0.62 (0.5, 0.78)	18.47 (23.14, 14.74)	29.49 (23.55, 36.89)	-11.02 (-18.42, -5.08)
Mental, Behavioral and Neurodevelopmental Disorders	Opioid-related disorders	0.13416	0.78 (0.57, 1.08)	9.13 (12.56, 6.63)	11.65 (8.47, 16.02)	-2.52 (-6.89, 0.66)
Mental, Behavioral and Neurodevelopmental Disorders	Cannabis-related disorders	0.0257787	0.69 (0.49, 0.96)	9.57 (13.3, 6.89)	13.91 (10.01, 19.31)	-4.34 (-9.74, -0.44)
Mental, Behavioral and Neurodevelopmental Disorders	Sedative-related disorders	0.677723	1.12 (0.65, 1.94)	2.86 (4.94, 1.65)	2.55 (1.47, 4.4)	0.31 (-1.54, 1.39)
Mental, Behavioral and Neurodevelopmental Disorders	Stimulant-related disorders	0.236573	0.81 (0.57, 1.15)	9.15 (12.94, 6.46)	11.28 (7.97, 15.95)	-2.13 (-6.8, 1.18)
Mental, Behavioral and Neurodevelopmental Disorders	Hallucinogen-related disorders
Mental, Behavioral and Neurodevelopmental Disorders	Inhalant-related disorders
Mental, Behavioral and Neurodevelopmental Disorders	Tobacco-related disorders	2.98699e-07	0.6 (0.49, 0.73)	24.62 (29.9, 20.26)	40.87 (33.68, 49.55)	-16.25 (-24.93, -9.07)
Mental, Behavioral and Neurodevelopmental Disorders	Other specified substance-related disorders	0.132634	0.75 (0.52, 1.09)	7.29 (10.52, 5.05)	9.66 (6.69, 13.93)	-2.37 (-6.64, 0.6)
Mental, Behavioral and Neurodevelopmental Disorders	Mental and substance use disorders in remission	0.482148	0.93 (0.77, 1.13)	30.43 (36.78, 25.17)	32.57 (26.95, 39.35)	-2.14 (-8.92, 3.49)
Mental, Behavioral and Neurodevelopmental Disorders	Suicide attempt/intentional self-harm; subsequent encounter
Mental, Behavioral and Neurodevelopmental Disorders	Opioid-related disorders; subsequent encounter
Mental, Behavioral and Neurodevelopmental Disorders	Stimulant-related disorders; subsequent encounter
Mental, Behavioral and Neurodevelopmental Disorders	Cannabis-related disorders; subsequent encounter
Mental, Behavioral and Neurodevelopmental Disorders	Hallucinogen-related disorders; subsequent encounter
Mental, Behavioral and Neurodevelopmental Disorders	Sedative-related disorders; subsequent encounter
Mental, Behavioral and Neurodevelopmental Disorders	Inhalant-related disorders; subsequent encounter
Mental, Behavioral and Neurodevelopmental Disorders	Mental and substance use disorders; sequela
Diseases of the Musculoskeletal System and Connective Tissue	Infective arthritis	0.0125803	2.07 (1.17, 3.66)	3.17 (5.6, 1.79)	1.53 (0.87, 2.71)	1.64 (0.46, 2.3)
Diseases of the Musculoskeletal System and Connective Tissue	Osteomyelitis	0.000113273	1.86 (1.36, 2.54)	11.22 (15.33, 8.21)	6.06 (4.43, 8.29)	5.16 (2.93, 6.79)
Diseases of the Musculoskeletal System and Connective Tissue	Rheumatoid arthritis and related disease	0.180914	1.4 (0.85, 2.31)	3.38 (5.55, 2.06)	2.41 (1.47, 3.96)	0.97 (-0.58, 1.91)
Diseases of the Musculoskeletal System and Connective Tissue	Juvenile arthritis
Diseases of the Musculoskeletal System and Connective Tissue	Other specified chronic arthropathy
Diseases of the Musculoskeletal System and Connective Tissue	Osteoarthritis	0.572872	1.04 (0.9, 1.21)	53.71 (62.11, 46.41)	51.5 (44.5, 59.57)	2.21 (-5.86, 9.21)
Diseases of the Musculoskeletal System and Connective Tissue	Other specified joint disorders	0.120155	1.18 (0.96, 1.45)	26.7 (32.7, 21.79)	22.72 (18.54, 27.85)	3.97 (-1.15, 8.16)
Diseases of the Musculoskeletal System and Connective Tissue	Immune-mediated/reactive arthropathies
Diseases of the Musculoskeletal System and Connective Tissue	Tendon and synovial disorders	0.940881	1.01 (0.77, 1.32)	15.39 (20.06, 11.8)	15.24 (11.69, 19.86)	0.15 (-4.47, 3.7)
Diseases of the Musculoskeletal System and Connective Tissue	Musculoskeletal pain, not low back pain	0.735301	0.98 (0.88, 1.1)	136.05 (150.74, 122.68)	138.48 (124.89, 153.42)	-2.44 (-17.38, 11.15)
Diseases of the Musculoskeletal System and Connective Tissue	Spondylopathies/spondyloarthropathy (including infective)	0.259205	1.09 (0.94, 1.26)	61.27 (70.43, 53.27)	56.54 (49.14, 65.01)	4.74 (-3.74, 12.14)
Diseases of the Musculoskeletal System and Connective Tissue	Biomechanical lesions	0.0698135	0.6 (0.35, 1.04)	2.71 (4.66, 1.57)	4.48 (2.6, 7.7)	-1.77 (-5, 0.11)
Diseases of the Musculoskeletal System and Connective Tissue	Osteoporosis	0.192053	0.76 (0.5, 1.15)	5.41 (8.2, 3.57)	7.13 (4.71, 10.8)	-1.72 (-5.39, 0.7)
Diseases of the Musculoskeletal System and Connective Tissue	Pathological fracture, initial encounter
Diseases of the Musculoskeletal System and Connective Tissue	Pathological fracture, subsequent encounter	1	1 (0.47, 2.15)	1.45 (3.11, 0.68)	1.45 (0.68, 3.11)	0 (-1.65, 0.78)
Diseases of the Musculoskeletal System and Connective Tissue	Stress fracture, initial encounter
Diseases of the Musculoskeletal System and Connective Tissue	Stress fracture, subsequent encounter
Diseases of the Musculoskeletal System and Connective Tissue	Atypical fracture, initial encounter
Diseases of the Musculoskeletal System and Connective Tissue	Atypical fracture, subsequent encounter
Diseases of the Musculoskeletal System and Connective Tissue	Pathological, stress and atypical fractures, sequela	0.119741	0.64 (0.36, 1.12)	2.51 (4.43, 1.42)	3.94 (2.23, 6.94)	-1.43 (-4.43, 0.28)
Diseases of the Musculoskeletal System and Connective Tissue	Acquired foot deformities	0.677723	0.95 (0.75, 1.21)	17.01 (21.6, 13.39)	17.9 (14.09, 22.72)	-0.88 (-5.71, 2.92)
Diseases of the Musculoskeletal System and Connective Tissue	Scoliosis and other postural dorsopathic deformities	0.490103	0.78 (0.39, 1.58)	1.49 (3.01, 0.74)	1.91 (0.95, 3.85)	-0.42 (-2.36, 0.55)
Diseases of the Musculoskeletal System and Connective Tissue	Acquired deformities (excluding foot)	0.177683	0.73 (0.46, 1.15)	3.87 (6.12, 2.45)	5.3 (3.35, 8.38)	-1.43 (-4.51, 0.52)
Diseases of the Musculoskeletal System and Connective Tissue	Systemic lupus erythematosus and connective tissue disorders	0.6258	1.16 (0.65, 2.07)	3.72 (6.66, 2.08)	3.22 (1.8, 5.76)	0.5 (-2.04, 1.92)
Diseases of the Musculoskeletal System and Connective Tissue	Other specified connective tissue disease	0.114049	0.86 (0.72, 1.04)	27.79 (33.34, 23.15)	32.18 (26.82, 38.59)	-4.39 (-10.8, 0.96)
Diseases of the Musculoskeletal System and Connective Tissue	Muscle disorders	5.6791e-10	1.42 (1.27, 1.59)	101.08 (112.26, 90.96)	72.27 (64.93, 80.4)	28.81 (20.68, 36.15)
Diseases of the Musculoskeletal System and Connective Tissue	Musculoskeletal abscess
Diseases of the Musculoskeletal System and Connective Tissue	Other specified bone disease and musculoskeletal deformities	0.249357	0.84 (0.63, 1.13)	10.82 (14.41, 8.12)	12.8 (9.61, 17.04)	-1.98 (-6.23, 1.21)
Diseases of the Musculoskeletal System and Connective Tissue	Disorders of jaw	0.717811	1.08 (0.72, 1.61)	6.44 (9.63, 4.31)	5.98 (4, 8.94)	0.46 (-2.5, 2.44)
Diseases of the Musculoskeletal System and Connective Tissue	Aseptic necrosis and osteonecrosis	0.51475	0.85 (0.51, 1.4)	3.32 (5.5, 2)	3.93 (2.37, 6.51)	-0.61 (-3.19, 0.95)
Diseases of the Musculoskeletal System and Connective Tissue	Traumatic arthropathy
Diseases of the Musculoskeletal System and Connective Tissue	Neurogenic/neuropathic arthropathy
Diseases of the Musculoskeletal System and Connective Tissue	Gout	0.638431	1.06 (0.84, 1.32)	20.12 (25.12, 16.11)	19.08 (15.28, 23.82)	1.04 (-3.7, 4.85)
Diseases of the Musculoskeletal System and Connective Tissue	Crystal arthropathies (excluding gout)	0.61012	1.2 (0.6, 2.42)	1.86 (3.73, 0.92)	1.55 (0.77, 3.11)	0.31 (-1.26, 1.09)
Diseases of the Musculoskeletal System and Connective Tissue	Osteomalacia
Diseases of the Musculoskeletal System and Connective Tissue	Autoinflammatory syndromes
Diseases of the Musculoskeletal System and Connective Tissue	Postprocedural or postoperative musculoskeletal system complication	0.862945	1.08 (0.47, 2.46)	1.58 (3.61, 0.69)	1.47 (0.64, 3.36)	0.11 (-1.78, 0.94)
Diseases of the Musculoskeletal System and Connective Tissue	Low back pain	0.484195	1.05 (0.92, 1.2)	76.26 (86.54, 67.16)	72.89 (64.17, 82.73)	3.38 (-6.47, 12.09)
Neoplasms	Head and neck cancers - eye
Neoplasms	Head and neck cancers - lip and oral cavity
Neoplasms	Head and neck cancers - throat
Neoplasms	Head and neck cancers - salivary gland
Neoplasms	Head and neck cancers - nasopharyngeal
Neoplasms	Head and neck cancers - hypopharyngeal
Neoplasms	Head and neck cancers - pharyngeal
Neoplasms	Head and neck cancers - laryngeal
Neoplasms	Head and neck cancers - tonsils
Neoplasms	Head and neck cancers - all other types
Neoplasms	Cardiac cancers
Neoplasms	Gastrointestinal cancers - esophagus
Neoplasms	Gastrointestinal cancers - stomach
Neoplasms	Gastrointestinal cancers - small intestine
Neoplasms	Gastrointestinal cancers - colorectal	0.472124	0.79 (0.42, 1.5)	2.05 (3.88, 1.08)	2.59 (1.37, 4.9)	-0.54 (-2.85, 0.68)
Neoplasms	Gastrointestinal cancers - anus
Neoplasms	Gastrointestinal cancers - liver	0.542133	0.78 (0.35, 1.73)	1.5 (3.32, 0.67)	1.92 (0.86, 4.26)	-0.42 (-2.76, 0.63)
Neoplasms	Gastrointestinal cancers - bile duct
Neoplasms	Gastrointestinal cancers - gallbladder
Neoplasms	Gastrointestinal cancers - peritoneum
Neoplasms	Gastrointestinal cancers - all other types
Neoplasms	Respiratory cancers	0.424146	0.84 (0.54, 1.3)	4.82 (7.49, 3.09)	5.77 (3.71, 8.97)	-0.95 (-4.15, 1.11)
Neoplasms	Bone cancer
Neoplasms	Sarcoma
Neoplasms	Skin cancers - melanoma
Neoplasms	Skin cancers - basal cell carcinoma	0.178544	0.72 (0.45, 1.16)	4.12 (6.63, 2.55)	5.71 (3.54, 9.2)	-1.6 (-5.08, 0.57)
Neoplasms	Skin cancers - squamous cell carcinoma	0.0354909	0.58 (0.35, 0.96)	3.38 (5.59, 2.05)	5.79 (3.51, 9.56)	-2.41 (-6.18, -0.13)
Neoplasms	Skin cancers - all other types
Neoplasms	Breast cancer - ductal carcinoma in situ (DCIS)
Neoplasms	Breast cancer - all other types
Neoplasms	Female reproductive system cancers - uterus
Neoplasms	Female reproductive system cancers - cervix
Neoplasms	Female reproductive system cancers - ovary
Neoplasms	Female reproductive system cancers - fallopian tube
Neoplasms	Female reproductive system cancers - endometrium
Neoplasms	Female reproductive system cancers - vulva
Neoplasms	Female reproductive system cancers - vagina
Neoplasms	Female reproductive system cancers - all other types
Neoplasms	Male reproductive system cancers - prostate	0.0601915	0.71 (0.49, 1.02)	7.21 (10.37, 5.02)	10.22 (7.11, 14.67)	-3 (-7.46, 0.11)
Neoplasms	Male reproductive system cancers - testis
Neoplasms	Male reproductive system cancers - penis
Neoplasms	Male reproductive system cancers - all other types
Neoplasms	Urinary system cancers - bladder	0.279422	0.7 (0.37, 1.34)	2.4 (4.57, 1.26)	3.42 (1.8, 6.51)	-1.02 (-4.11, 0.6)
Neoplasms	Urinary system cancers - ureter and renal pelvis
Neoplasms	Urinary system cancers - kidney	0.847262	1.06 (0.57, 1.99)	2.37 (4.42, 1.27)	2.23 (1.19, 4.16)	0.14 (-1.79, 1.18)
Neoplasms	Urinary system cancers - urethra
Neoplasms	Urinary system cancers - all other types
Neoplasms	Nervous system cancers - brain
Neoplasms	Nervous system cancers - all other types
Neoplasms	Endocrine system cancers - thyroid
Neoplasms	Endocrine system cancers - pancreas
Neoplasms	Endocrine system cancers - thymus
Neoplasms	Endocrine system cancers - adrenocortical
Neoplasms	Endocrine system cancers - parathyroid
Neoplasms	Endocrine system cancers - pituitary gland
Neoplasms	Endocrine system cancers - all other types
Neoplasms	Hodgkin lymphoma
Neoplasms	Non-Hodgkin lymphoma
Neoplasms	Leukemia - acute lymphoblastic leukemia (ALL)
Neoplasms	Leukemia - acute myeloid leukemia (AML)
Neoplasms	Leukemia - chronic lymphocytic leukemia (CLL)
Neoplasms	Leukemia - chronic myeloid leukemia (CML)
Neoplasms	Leukemia - hairy cell
Neoplasms	Leukemia - all other types
Neoplasms	Multiple myeloma
Neoplasms	Malignant neuroendocrine tumors
Neoplasms	Mesothelioma
Neoplasms	Myelodysplastic syndrome (MDS)
Neoplasms	Cancer of other sites
Neoplasms	Secondary malignancies	0.763163	0.95 (0.67, 1.35)	9.33 (13.22, 6.58)	9.84 (6.94, 13.95)	-0.51 (-4.62, 2.39)
Neoplasms	Malignant neoplasm, unspecified	0.742663	0.85 (0.32, 2.25)	0.97 (2.56, 0.36)	1.14 (0.43, 3.01)	-0.17 (-2.04, 0.54)
Neoplasms	Neoplasms of unspecified nature or uncertain behavior	0.0601697	0.83 (0.68, 1.01)	25.2 (30.6, 20.74)	30.36 (25, 36.84)	-5.16 (-11.64, 0.2)
Neoplasms	Benign neoplasms	0.0556367	0.86 (0.73, 1)	42.87 (49.94, 36.78)	49.77 (42.72, 57.94)	-6.89 (-15.07, 0.15)
Neoplasms	Conditions due to neoplasm or the treatment of neoplasm	0.268108	0.82 (0.58, 1.16)	9.27 (13.05, 6.59)	11.25 (7.99, 15.82)	-1.97 (-6.55, 1.28)
Diseases of the Nervous System	Meningitis
Diseases of the Nervous System	Encephalitis	0.132437	2.12 (0.8, 5.66)	1.29 (3.44, 0.49)	0.61 (0.23, 1.62)	0.68 (-0.33, 1.06)
Diseases of the Nervous System	Other specified CNS infection and poliomyelitis
Diseases of the Nervous System	Parkinson`s disease	0.106487	0.64 (0.38, 1.1)	2.85 (4.87, 1.66)	4.43 (2.59, 7.58)	-1.58 (-4.73, 0.26)
Diseases of the Nervous System	Multiple sclerosis
Diseases of the Nervous System	Other specified hereditary and degenerative nervous system conditions	0.132831	1.14 (0.96, 1.35)	40.55 (47.79, 34.39)	35.74 (30.3, 42.14)	4.81 (-1.59, 10.26)
Diseases of the Nervous System	Cerebral palsy
Diseases of the Nervous System	Paralysis (other than cerebral palsy)	0.0508563	1.49 (1, 2.23)	6.79 (10.14, 4.55)	4.56 (3.05, 6.8)	2.24 (-0.01, 3.74)
Diseases of the Nervous System	Epilepsy; convulsions	0.00101901	1.54 (1.19, 2)	16.57 (21.42, 12.81)	10.77 (8.32, 13.93)	5.8 (2.64, 8.25)
Diseases of the Nervous System	Headache; including migraine	0.129649	1.17 (0.95, 1.44)	27.33 (33.48, 22.3)	23.35 (19.04, 28.62)	3.98 (-1.29, 8.29)
Diseases of the Nervous System	Neurocognitive disorders	2.11072e-09	1.58 (1.36, 1.83)	63.66 (73.52, 55.08)	40.83 (35.27, 47.25)	22.83 (16.42, 28.39)
Diseases of the Nervous System	Transient cerebral ischemia	0.627914	0.91 (0.62, 1.34)	5.8 (8.52, 3.95)	6.38 (4.35, 9.37)	-0.58 (-3.56, 1.46)
Diseases of the Nervous System	Coma; stupor; and brain damage	0.0661564	1.46 (0.98, 2.17)	6 (8.94, 4.02)	4.13 (2.77, 6.15)	1.87 (-0.15, 3.23)
Diseases of the Nervous System	CNS abscess
Diseases of the Nervous System	Polyneuropathies	0.402817	1.07 (0.91, 1.27)	38.84 (45.65, 33.03)	36.25 (30.81, 42.61)	2.6 (-3.77, 8.03)
Diseases of the Nervous System	Sleep wake disorders	0.00022726	1.23 (1.1, 1.37)	128.65 (142.54, 116.02)	105.86 (95.34, 117.46)	22.79 (11.19, 33.31)
Diseases of the Nervous System	Nerve and nerve root disorders	0.601793	0.94 (0.73, 1.2)	14.5 (18.61, 11.3)	15.5 (12.08, 19.88)	-1 (-5.38, 2.43)
Diseases of the Nervous System	Myopathies	2.61444e-11	5.36 (3.27, 8.78)	10.09 (16.47, 6.17)	1.89 (1.15, 3.1)	8.2 (6.99, 8.93)
Diseases of the Nervous System	Nervous system pain and pain syndromes	0.197779	1.1 (0.95, 1.26)	59.62 (68.18, 52.1)	54.56 (47.66, 62.43)	5.05 (-2.81, 11.95)
Diseases of the Nervous System	Other specified nervous system disorders	7.20363e-10	1.49 (1.31, 1.69)	80.48 (90.88, 71.22)	54.71 (48.34, 61.89)	25.77 (18.59, 32.14)
Diseases of the Nervous System	Postprocedural or postoperative nervous system complication
Diseases of the Nervous System	Sequela of specified nervous system conditions
Diseases of the Respiratory System	Sinusitis	0.000184766	0.53 (0.38, 0.74)	7.68 (10.73, 5.49)	14.54 (10.41, 20.3)	-6.86 (-12.62, -2.73)
Diseases of the Respiratory System	Pneumonia (except that caused by tuberculosis)	6.09609e-93	2.58 (2.36, 2.83)	185.4 (201.14, 170.76)	76.36 (69.97, 83.32)	109.04 (102.08, 115.44)
Diseases of the Respiratory System	Influenza
Diseases of the Respiratory System	Acute and chronic tonsillitis
Diseases of the Respiratory System	Acute bronchitis	4.71222e-12	0.35 (0.26, 0.47)	9.02 (12.11, 6.72)	25.38 (18.95, 33.95)	-16.36 (-24.93, -9.92)
Diseases of the Respiratory System	Other specified upper respiratory infections	7.95061e-05	0.62 (0.48, 0.78)	14.86 (18.87, 11.7)	24.02 (18.93, 30.46)	-9.16 (-15.6, -4.07)
Diseases of the Respiratory System	Other specified and unspecified upper respiratory disease	0.087553	0.86 (0.73, 1.02)	35.5 (41.95, 30.03)	41.06 (34.75, 48.49)	-5.56 (-12.99, 0.75)
Diseases of the Respiratory System	Chronic obstructive pulmonary disease and bronchiectasis	0.000281057	0.8 (0.7, 0.9)	80.91 (91.05, 71.86)	100.64 (89.49, 113.08)	-19.72 (-32.17, -8.57)
Diseases of the Respiratory System	Asthma	0.0639446	0.78 (0.59, 1.02)	12.53 (16.38, 9.58)	16.14 (12.34, 21.09)	-3.61 (-8.56, 0.18)
Diseases of the Respiratory System	Aspiration pneumonitis	4.30885e-06	1.8 (1.4, 2.31)	19.72 (25.24, 15.39)	11.02 (8.6, 14.13)	8.69 (5.59, 11.12)
Diseases of the Respiratory System	Pleurisy, pleural effusion and pulmonary collapse	0.0588252	1.17 (0.99, 1.39)	35.52 (41.79, 30.18)	30.36 (25.79, 35.73)	5.16 (-0.21, 9.74)
Diseases of the Respiratory System	Respiratory failure; insufficiency; arrest	3.67038e-65	2.39 (2.16, 2.65)	132.46 (145.37, 120.62)	57.67 (52.31, 63.56)	74.79 (68.91, 80.15)
Diseases of the Respiratory System	Lung disease due to external agents	0.905479	0.96 (0.52, 1.78)	2.36 (4.35, 1.28)	2.45 (1.32, 4.52)	-0.09 (-2.16, 1.03)
Diseases of the Respiratory System	Pneumothorax	0.000771281	2.19 (1.39, 3.45)	5.77 (9.09, 3.66)	2.64 (1.68, 4.17)	3.13 (1.6, 4.09)
Diseases of the Respiratory System	Mediastinal disorders
Diseases of the Respiratory System	Other specified and unspecified lower respiratory disease	4.56665e-07	1.44 (1.25, 1.67)	55.73 (64, 48.49)	38.93 (33.84, 44.77)	16.79 (10.96, 21.88)
Diseases of the Respiratory System	Postprocedural or postoperative respiratory system complication	1.2118e-19	5.07 (3.57, 7.21)	14.99 (21.23, 10.58)	2.97 (2.09, 4.22)	12.02 (10.77, 12.9)
Diseases of the Skin and Subcutaneous Tissue	Skin and subcutaneous tissue infections	0.90092	0.99 (0.84, 1.17)	38.7 (45.51, 32.9)	39.11 (33.24, 45.98)	-0.4 (-7.28, 5.47)
Diseases of the Skin and Subcutaneous Tissue	Other specified inflammatory condition of skin	0.422122	1.08 (0.9, 1.28)	34.05 (40.51, 28.61)	31.71 (26.64, 37.73)	2.34 (-3.68, 7.42)
Diseases of the Skin and Subcutaneous Tissue	Pressure ulcer of skin	8.70292e-12	1.73 (1.48, 2.03)	49.02 (57.17, 42.01)	28.57 (24.45, 33.38)	20.45 (15.64, 24.57)
Diseases of the Skin and Subcutaneous Tissue	Non-pressure ulcer of skin	0.482193	1.09 (0.86, 1.38)	19.05 (24.04, 15.08)	17.52 (13.87, 22.12)	1.53 (-3.07, 5.18)
Diseases of the Skin and Subcutaneous Tissue	Contact dermatitis	0.628794	1.07 (0.82, 1.39)	12.4 (16.11, 9.54)	11.62 (8.94, 15.1)	0.78 (-2.7, 3.46)
Diseases of the Skin and Subcutaneous Tissue	Postprocedural or postoperative skin complication	0.972366	0.99 (0.52, 1.89)	2.47 (4.7, 1.3)	2.5 (1.31, 4.76)	-0.03 (-2.29, 1.16)
Diseases of the Skin and Subcutaneous Tissue	Other specified and unspecified skin disorders	0.00185132	0.81 (0.71, 0.92)	70.38 (80.04, 61.85)	86.3 (75.92, 98.02)	-15.92 (-27.64, -5.54)
Symptoms, Signs and Abnormal Clinical and Laboratory Findings, Not Elsewhere Classified	Syncope	0.267116	0.88 (0.7, 1.11)	18.1 (22.78, 14.37)	20.62 (16.38, 25.95)	-2.52 (-7.85, 1.72)
Symptoms, Signs and Abnormal Clinical and Laboratory Findings, Not Elsewhere Classified	Fever	0.0264004	1.27 (1.03, 1.57)	24.91 (30.71, 20.19)	19.64 (15.91, 24.23)	5.27 (0.68, 9)
Symptoms, Signs and Abnormal Clinical and Laboratory Findings, Not Elsewhere Classified	Shock	4.42885e-23	3.06 (2.45, 3.82)	32.25 (40.09, 25.93)	10.66 (8.55, 13.29)	21.59 (18.97, 23.7)
Symptoms, Signs and Abnormal Clinical and Laboratory Findings, Not Elsewhere Classified	Nausea and vomiting	0.578541	1.06 (0.87, 1.28)	27.31 (33.08, 22.53)	25.86 (21.34, 31.34)	1.45 (-4.02, 5.97)
Symptoms, Signs and Abnormal Clinical and Laboratory Findings, Not Elsewhere Classified	Dysphagia	1.67695e-09	1.45 (1.28, 1.63)	78.62 (88.23, 70.02)	54.97 (48.89, 61.79)	23.65 (16.83, 29.73)
Symptoms, Signs and Abnormal Clinical and Laboratory Findings, Not Elsewhere Classified	Abdominal pain and other digestive/abdomen signs and symptoms	0.690634	1.02 (0.91, 1.15)	84.15 (94.24, 75.1)	82.23 (73.38, 92.1)	1.92 (-7.95, 10.77)
Symptoms, Signs and Abnormal Clinical and Laboratory Findings, Not Elsewhere Classified	Malaise and fatigue	4.11572e-17	1.54 (1.39, 1.7)	132.5 (145.45, 120.63)	88.2 (80.11, 97.06)	44.3 (35.44, 52.39)
Symptoms, Signs and Abnormal Clinical and Laboratory Findings, Not Elsewhere Classified	Symptoms of mental and substance use conditions	3.30622e-06	1.85 (1.43, 2.39)	18.27 (23.6, 14.14)	9.94 (7.69, 12.85)	8.33 (5.42, 10.59)
Symptoms, Signs and Abnormal Clinical and Laboratory Findings, Not Elsewhere Classified	Abnormal findings related to substance use
Symptoms, Signs and Abnormal Clinical and Laboratory Findings, Not Elsewhere Classified	Nervous system signs and symptoms	9.7621e-08	1.3 (1.18, 1.43)	162.57 (177.53, 148.75)	127.47 (116.43, 139.48)	35.09 (23.09, 46.14)
Symptoms, Signs and Abnormal Clinical and Laboratory Findings, Not Elsewhere Classified	Genitourinary signs and symptoms	0.102019	1.12 (0.98, 1.27)	63.67 (72.27, 56.06)	57.26 (50.39, 65.02)	6.41 (-1.35, 13.28)
Symptoms, Signs and Abnormal Clinical and Laboratory Findings, Not Elsewhere Classified	Circulatory signs and symptoms	3.49673e-05	1.29 (1.15, 1.46)	80.95 (90.97, 71.99)	63.14 (56.09, 71.05)	17.8 (9.9, 24.85)
Symptoms, Signs and Abnormal Clinical and Laboratory Findings, Not Elsewhere Classified	Respiratory signs and symptoms	0.0063978	1.14 (1.04, 1.25)	177.68 (193.08, 163.39)	158.08 (145.22, 171.96)	19.6 (5.72, 32.46)
Symptoms, Signs and Abnormal Clinical and Laboratory Findings, Not Elsewhere Classified	Skin/Subcutaneous signs and symptoms	0.824813	0.98 (0.85, 1.14)	50.66 (58.27, 44.01)	51.46 (44.72, 59.2)	-0.81 (-8.54, 5.94)
Symptoms, Signs and Abnormal Clinical and Laboratory Findings, Not Elsewhere Classified	General sensation/perception signs and symptoms	0.756684	1.03 (0.85, 1.25)	29.85 (36.11, 24.66)	28.96 (23.92, 35.04)	0.89 (-5.19, 5.93)
Symptoms, Signs and Abnormal Clinical and Laboratory Findings, Not Elsewhere Classified	Other general signs and symptoms	0.000510203	1.17 (1.07, 1.28)	203.46 (220.26, 187.79)	176.41 (162.6, 191.25)	27.05 (12.21, 40.86)
Symptoms, Signs and Abnormal Clinical and Laboratory Findings, Not Elsewhere Classified	Abnormal findings without diagnosis	0.0035423	1.15 (1.05, 1.26)	183.32 (199.2, 168.58)	161.78 (148.61, 175.99)	21.55 (7.33, 34.72)
