# Supplementary material for: High Dimensional Characterization of Post-acute Sequalae of COVID-19: analysis of health outcomes and clinical manifestations at 6 months
Source: Research Square preprint supplement (doi:10.21203/rs.3.rs-150398/v1), 2021-01-21
Supplement: Supplementary file 11 [file f1c8dffb1477e71603e8481b.xlsx]

## Sheet: hospitalized COVID vs flu med
Supplementary information table 5: Identification of the post-acute incident medication use in people who had been hospitalized with COVID-19 vs. those who had been hospitalized with seasonal influenza
People who had been hospitalized with seasonal influenza served as the referent category
Model based on survival models adjusted through overlap weighting
Outcomes were ascertained from day 30 after hospital admission until end of follow-up
Medications with less than 10 events in either group were not modelled
A P value of less than 6.57*10^-5 was considered statistically significant
Medication group	Medication class	P value	Hazard ratio (95% Confidence interval)	Incident rate per 1000 at 6-months in hospitalized COVID-19 (95% confidence interval)	Incident rate per 1000 at 6-months in hospitalized seasonal influenza (95% confidence interval)	Excess burden per 1000 hospitalized COVID-19 patients at 6-months (95% confidence interval)
ANTIDOTES,DETERRENTS AND POISON CONTROL	ALCOHOL DETERRENTS	0.0998774	0.61 (0.34 ,1.1)	2.53 (4.53 ,1.41)	4.13 (2.3 ,7.4)	-1.6 (-4.87, 0.23)
ANTIDOTES,DETERRENTS AND POISON CONTROL	CYANIDE ANTIDOTES
ANTIDOTES,DETERRENTS AND POISON CONTROL	HEAVY METAL ANTAGONISTS
ANTIDOTES,DETERRENTS AND POISON CONTROL	ANTIDOTES,DETERRENTS,AND POISON CONTROL EXCHANGE RESINS	0.0235917	1.33 (1.04 ,1.71)	17.81 (22.79 ,13.92)	13.39 (10.46 ,17.15)	4.42 (0.67, 7.36)
ANTIDOTES,DETERRENTS AND POISON CONTROL	ANTIDOTES/DETERRENTS,OTHER	1.13244e-11	0.46 (0.37 ,0.57)	16.79 (20.99 ,13.43)	36.25 (29.05 ,45.18)	-19.45 (-28.39, -12.26)
ANTIHISTAMINES	ANTIHISTAMINES,PHENOTHIAZINE	0.0342476	0.61 (0.38 ,0.96)	4.06 (6.45 ,2.55)	6.7 (4.21 ,10.65)	-2.64 (-6.59, -0.15)
ANTIHISTAMINES	ANTIHISTAMINES,ETHANOLAMINE	0.319376	1.1 (0.91 ,1.34)	28.85 (34.92 ,23.83)	26.18 (21.62 ,31.7)	2.67 (-2.84, 7.24)
ANTIHISTAMINES	ANTIHISTAMINES,ETHYLENEDIAMINE
ANTIHISTAMINES	ANTIHISTAMINES,ALKYLAMINE
ANTIHISTAMINES	ANTIHISTAMINES,PIPERAZINE	0.0773131	1.15 (0.99 ,1.33)	53.13 (61.53 ,45.86)	46.53 (40.14 ,53.91)	6.6 (-0.78, 13)
ANTIHISTAMINES	ANTIHISTAMINES,BUTYROPHENONE
ANTIHISTAMINES	ANTIHISTAMINES,PIPERIDINE	0.0230226	2.72 (1.15 ,6.45)	1.21 (2.86 ,0.51)	0.44 (0.19 ,1.05)	0.76 (0.16, 1.02)
ANTIHISTAMINES	ANTIHISTAMINES,OTHER	0.0360466	0.8 (0.64 ,0.99)	21.76 (26.88 ,17.61)	27.28 (22.09 ,33.68)	-5.52 (-11.92, -0.32)
ANTIMICROBIALS	PENICILLIN-G RELATED PENICILLINS	0.51609	0.76 (0.33 ,1.74)	1.68 (3.83 ,0.73)	2.2 (0.97 ,5.03)	-0.53 (-3.35, 0.71)
ANTIMICROBIALS	PENICILLINS,AMINO DERIVATIVES	0.06743	0.87 (0.76 ,1.01)	52.19 (60.02 ,45.35)	59.46 (51.7 ,68.35)	-7.28 (-16.16, 0.49)
ANTIMICROBIALS	PENICILLINASE-RESISTANT PENICILLINS
ANTIMICROBIALS	EXTENDED SPECTRUM PENICILLINS	0.00545701	2.36 (1.29 ,4.34)	3.58 (6.57 ,1.96)	1.52 (0.83 ,2.78)	2.07 (0.8, 2.76)
ANTIMICROBIALS	(INACTIVE) PENICILLINS
ANTIMICROBIALS	CEPHALOSPORIN 1ST GENERATION	0.254414	0.9 (0.76 ,1.08)	32.71 (38.85 ,27.52)	36.15 (30.43 ,42.92)	-3.44 (-10.21, 2.28)
ANTIMICROBIALS	CEPHALOSPORIN 2ND GENERATION	0.126122	0.69 (0.43 ,1.11)	4.51 (7.2 ,2.82)	6.5 (4.07 ,10.37)	-1.99 (-5.86, 0.44)
ANTIMICROBIALS	CEPHALOSPORIN 3RD GENERATION	1.93015e-05	1.56 (1.27 ,1.91)	26.85 (32.82 ,21.97)	17.32 (14.15 ,21.18)	9.54 (5.67, 12.7)
ANTIMICROBIALS	CEPHALOSPORIN 4TH GENERATION	0.000304566	2.91 (1.63 ,5.2)	4.27 (7.61 ,2.39)	1.47 (0.82 ,2.62)	2.8 (1.65, 3.45)
ANTIMICROBIALS	BETA-LACTAMS ANTIMICROBIALS,OTHER	0.0218788	2.32 (1.13 ,4.77)	2.2 (4.51 ,1.07)	0.95 (0.46 ,1.94)	1.25 (0.25, 1.74)
ANTIMICROBIALS	MONOBACTAMS
ANTIMICROBIALS	CHLORAMPHENICOL
ANTIMICROBIALS	ERYTHROMYCINS/MACROLIDES	1.9627e-07	0.59 (0.49 ,0.72)	23.48 (28.51 ,19.33)	39.25 (32.36 ,47.58)	-15.78 (-24.1, -8.88)
ANTIMICROBIALS	TETRACYCLINES	0.202994	0.91 (0.78 ,1.05)	45.47 (52.69 ,39.23)	50.04 (43.18 ,57.96)	-4.57 (-12.48, 2.29)
ANTIMICROBIALS	AMINOGLYCOSIDES
ANTIMICROBIALS	LINCOMYCINS	0.108242	0.79 (0.59 ,1.05)	10.85 (14.48 ,8.12)	13.75 (10.29 ,18.35)	-2.9 (-7.5, 0.55)
ANTIMICROBIALS	QUINOLONES	0.000271376	0.74 (0.63 ,0.87)	37.49 (43.88 ,32.02)	50.2 (42.91 ,58.69)	-12.71 (-21.2, -5.42)
ANTIMICROBIALS	ANTITUBERCULARS	0.637369	1.19 (0.58 ,2.43)	2.17 (4.42 ,1.06)	1.82 (0.89 ,3.73)	0.34 (-1.56, 1.27)
ANTIMICROBIALS	METHENAMINE SALTS ANTIMICROBIALS
ANTIMICROBIALS	NITROFURANS ANTIMICROBIALS	0.732752	1.05 (0.78 ,1.41)	10.07 (13.51 ,7.51)	9.57 (7.13 ,12.84)	0.5 (-2.76, 2.94)
ANTIMICROBIALS	SULFONAMIDE/RELATED ANTIMICROBIALS	0.402045	1.08 (0.9 ,1.29)	34.8 (41.44 ,29.21)	32.3 (27.1 ,38.46)	2.51 (-3.66, 7.7)
ANTIMICROBIALS	ANTIFUNGALS	0.229994	1.14 (0.92 ,1.4)	22.46 (27.64 ,18.24)	19.77 (16.05 ,24.34)	2.69 (-1.88, 6.4)
ANTIMICROBIALS	ANTIVIRALS	1.17313e-06	0.48 (0.36 ,0.65)	11.11 (14.85 ,8.3)	22.79 (17.06 ,30.41)	-11.68 (-19.3, -5.96)
ANTIMICROBIALS	ANTI-INFECTIVES,OTHER	0.831453	0.98 (0.82 ,1.18)	29.65 (35.46 ,24.78)	30.23 (25.27 ,36.15)	-0.58 (-6.5, 4.38)
ANTINEOPLASTICS	ANTINEOPLASTICS,ALKYLATING AGENTS
ANTINEOPLASTICS	ANTINEOPLASTIC ANTIBIOTICS
ANTINEOPLASTICS	ANTINEOPLASTICS,ANTIMETABOLITES	0.345125	1.41 (0.69 ,2.9)	2.02 (4.15 ,0.99)	1.43 (0.7 ,2.94)	0.59 (-0.91, 1.33)
ANTINEOPLASTICS	ANTINEOPLASTIC ADJUVANTS
ANTINEOPLASTICS	ANTINEOPLASTIC HORMONES	0.968093	1.01 (0.51 ,2.03)	1.81 (3.62 ,0.91)	1.79 (0.89 ,3.57)	0.03 (-1.76, 0.92)
ANTINEOPLASTICS	ANTINEOPLASTIC RADIOPHARMACEUTICALS
ANTINEOPLASTICS	PROTECTIVE AGENTS
ANTINEOPLASTICS	ANTINEOPLASTIC,OTHER	0.0270205	0.53 (0.3 ,0.93)	2.72 (4.81 ,1.54)	5.17 (2.93 ,9.14)	-2.46 (-6.42, -0.21)
ANTIPARASITICS	ANTIPROTOZOALS
ANTIPARASITICS	ANTIMALARIALS
ANTIPARASITICS	ANTIPROTOZOALS,OTHER
ANTIPARASITICS	ANTHELMINTICS	0.00290181	4.3 (1.65 ,11.22)	1.58 (4.13 ,0.61)	0.37 (0.14 ,0.96)	1.22 (0.62, 1.44)
ANTIPARASITICS	PEDICULICIDES
ANTIPARASITICS	ANTIPARASITICS,OTHER
AUTONOMIC MEDICATIONS	SYMPATHOMIMETICS (ADRENERGICS)	0.00359942	2.07 (1.27 ,3.38)	5.78 (9.42 ,3.55)	2.8 (1.72 ,4.56)	2.99 (1.22, 4.07)
AUTONOMIC MEDICATIONS	SYMPATHOLYTICS
AUTONOMIC MEDICATIONS	PARASYMPATHOMIMETICS (CHOLINERGICS)	0.0658281	1.34 (0.98 ,1.84)	11.05 (15.11 ,8.08)	8.24 (6.02 ,11.26)	2.81 (-0.21, 5.03)
AUTONOMIC MEDICATIONS	PARASYMPATHOLYTICS	0.036635	1.3 (1.02 ,1.65)	18.69 (23.79 ,14.68)	14.45 (11.35 ,18.4)	4.24 (0.3, 7.35)
AUTONOMIC MEDICATIONS	AUTONOMIC AGENTS,OTHER
BLOOD PRODUCTS/MODIFIERS/VOLUME EXPANDERS	ANTICOAGULANTS	3.42968e-25	1.55 (1.43 ,1.68)	251.43 (269.92 ,233.98)	170.38 (157.97 ,183.67)	81.04 (67.76, 93.46)
BLOOD PRODUCTS/MODIFIERS/VOLUME EXPANDERS	THROMBOLYTICS	0.000447747	1.84 (1.31 ,2.59)	11.09 (15.56 ,7.89)	6.03 (4.29 ,8.47)	5.05 (2.61, 6.79)
BLOOD PRODUCTS/MODIFIERS/VOLUME EXPANDERS	ANTIHEMORRHAGICS
BLOOD PRODUCTS/MODIFIERS/VOLUME EXPANDERS	PLATELET AGGREGATION INHIBITORS	0.149397	0.85 (0.67 ,1.06)	19.39 (24.27 ,15.49)	22.88 (18.27 ,28.62)	-3.48 (-9.22, 1.12)
BLOOD PRODUCTS/MODIFIERS/VOLUME EXPANDERS	HEPARIN ANTAGONISTS
BLOOD PRODUCTS/MODIFIERS/VOLUME EXPANDERS	BLOOD FORMATION PRODUCTS	0.788017	1.04 (0.77 ,1.41)	10.56 (14.27 ,7.8)	10.13 (7.49 ,13.7)	0.43 (-3.14, 3.07)
BLOOD PRODUCTS/MODIFIERS/VOLUME EXPANDERS	BLOOD DERIVATIVES	0.00190603	2.05 (1.3 ,3.23)	5.76 (9.06 ,3.66)	2.81 (1.79 ,4.42)	2.95 (1.34, 3.98)
BLOOD PRODUCTS/MODIFIERS/VOLUME EXPANDERS	VOLUME EXPANDERS
BLOOD PRODUCTS/MODIFIERS/VOLUME EXPANDERS	BLOOD PRODUCTS,OTHER
CENTRAL NERVOUS SYSTEM MEDICATIONS	ANALGESICS
CENTRAL NERVOUS SYSTEM MEDICATIONS	OPIOID ANALGESICS	0.278704	1.06 (0.95 ,1.18)	126.2 (139.2 ,114.33)	119.5 (108.22 ,131.87)	6.7 (-5.67, 17.98)
CENTRAL NERVOUS SYSTEM MEDICATIONS	OPIOID ANTAGONIST ANALGESICS	0.164125	0.84 (0.66 ,1.07)	18.47 (23.53 ,14.49)	21.93 (17.22 ,27.92)	-3.46 (-9.45, 1.25)
CENTRAL NERVOUS SYSTEM MEDICATIONS	NON-OPIOID ANALGESICS	3.37048e-08	1.31 (1.19 ,1.44)	265.08 (287.36 ,244.22)	209.82 (192.73 ,228.21)	55.26 (36.87, 72.35)
CENTRAL NERVOUS SYSTEM MEDICATIONS	NON-STEROIDAL ANTI-INFLAMMATORY ANALGESICS
CENTRAL NERVOUS SYSTEM MEDICATIONS	ANTIMIGRAINE AGENTS	0.0487483	1.69 (1 ,2.83)	4.64 (7.79 ,2.76)	2.76 (1.64 ,4.63)	1.89 (0.01, 3)
CENTRAL NERVOUS SYSTEM MEDICATIONS	ANESTHETICS
CENTRAL NERVOUS SYSTEM MEDICATIONS	ANESTHETICS,INHALATION
CENTRAL NERVOUS SYSTEM MEDICATIONS	BARBITURIC ACID DERIVATIVE ANESTHETICS
CENTRAL NERVOUS SYSTEM MEDICATIONS	GENERAL ANESTHETICS,OTHER	0.0347972	1.94 (1.05 ,3.58)	3.24 (5.98 ,1.76)	1.68 (0.91 ,3.1)	1.57 (0.15, 2.34)
CENTRAL NERVOUS SYSTEM MEDICATIONS	LOCAL ANESTHETICS,INJECTION	0.0850634	1.37 (0.96 ,1.97)	8.14 (11.65 ,5.68)	5.93 (4.14 ,8.5)	2.2 (-0.36, 4)
CENTRAL NERVOUS SYSTEM MEDICATIONS	ANESTHETIC ADJUNCTS
CENTRAL NERVOUS SYSTEM MEDICATIONS	SEDATIVES/HYPONTICS
CENTRAL NERVOUS SYSTEM MEDICATIONS	BARBITURIC ACID DERIVATIVE SEDATIVES/HYPNOTICS
CENTRAL NERVOUS SYSTEM MEDICATIONS	BENZODIAZEPINE DERIVATIVE SEDATIVES/HYPNOTICS	9.54344e-09	1.48 (1.29 ,1.69)	68.22 (77.59 ,59.94)	46.65 (40.93 ,53.14)	21.57 (15.08, 27.29)
CENTRAL NERVOUS SYSTEM MEDICATIONS	SEDATIVES/HYPNOTICS,OTHER	0.0373869	1.31 (1.02 ,1.69)	16.96 (21.79 ,13.19)	12.98 (10.09 ,16.69)	3.97 (0.26, 6.86)
CENTRAL NERVOUS SYSTEM MEDICATIONS	ANTICONVULSANTS	0.0127203	1.2 (1.04 ,1.38)	74.72 (85.61 ,65.17)	62.79 (54.72 ,72.01)	11.93 (2.72, 20.01)
CENTRAL NERVOUS SYSTEM MEDICATIONS	ANTIPARKINSON AGENTS	0.507219	0.85 (0.53 ,1.37)	4.66 (7.44 ,2.91)	5.46 (3.42 ,8.72)	-0.8 (-4.06, 1.24)
CENTRAL NERVOUS SYSTEM MEDICATIONS	ANTIVERTIGO AGENTS	0.479324	1.11 (0.83 ,1.5)	12.8 (17.22 ,9.51)	11.5 (8.54 ,15.47)	1.3 (-2.67, 4.26)
CENTRAL NERVOUS SYSTEM MEDICATIONS	ANTIDEPRESSANTS
CENTRAL NERVOUS SYSTEM MEDICATIONS	TRICYCLIC ANTIDEPRESSANTS	0.00505041	0.51 (0.32 ,0.82)	3.67 (5.89 ,2.29)	7.22 (4.5 ,11.56)	-3.54 (-7.89, -0.83)
CENTRAL NERVOUS SYSTEM MEDICATIONS	MONAMINE OXIDASE INHIBITOR ANTIDEPRESSANTS
CENTRAL NERVOUS SYSTEM MEDICATIONS	ANTIDEPRESSANTS,OTHER	0.00228093	1.21 (1.07 ,1.37)	106.63 (119.7 ,94.9)	88.91 (79.05 ,99.94)	17.71 (6.69, 27.58)
CENTRAL NERVOUS SYSTEM MEDICATIONS	ANTIPSYCHOTICS
CENTRAL NERVOUS SYSTEM MEDICATIONS	PHENOTHIAZINE/RELATED ANTIPSYCHOTICS	0.119795	0.52 (0.23 ,1.18)	1.37 (3.08 ,0.61)	2.61 (1.16 ,5.87)	-1.24 (-4.5, 0.21)
CENTRAL NERVOUS SYSTEM MEDICATIONS	ANTIPSYCHOTICS,OTHER	1.41466e-08	1.57 (1.34 ,1.83)	52.38 (60.87 ,45.04)	33.79 (29.01 ,39.33)	18.59 (13.04, 23.36)
CENTRAL NERVOUS SYSTEM MEDICATIONS	LITHIUM SALTS	0.92873	0.96 (0.41 ,2.28)	1.72 (4.07 ,0.73)	1.79 (0.76 ,4.24)	-0.07 (-2.52, 0.97)
CENTRAL NERVOUS SYSTEM MEDICATIONS	CNS STIMULANTS
CENTRAL NERVOUS SYSTEM MEDICATIONS	AMPHETAMINES
CENTRAL NERVOUS SYSTEM MEDICATIONS	AMPHETAMINE LIKE STIMULANTS
CENTRAL NERVOUS SYSTEM MEDICATIONS	CNS STIMULANTS,OTHER
CENTRAL NERVOUS SYSTEM MEDICATIONS	ANTIPYRETICS
CENTRAL NERVOUS SYSTEM MEDICATIONS	CNS MEDICATIONS,OTHER	0.610946	0.94 (0.73 ,1.21)	15.79 (20.33 ,12.25)	16.86 (13.09 ,21.71)	-1.07 (-5.92, 2.7)
CARDIOVASCULAR MEDICATIONS	DIGITALIS GLYCOSIDES	0.515941	1.12 (0.8 ,1.58)	8.73 (12.28 ,6.21)	7.8 (5.54 ,10.97)	0.93 (-2.24, 3.19)
CARDIOVASCULAR MEDICATIONS	BETA BLOCKERS/RELATED	0.613994	1.03 (0.91 ,1.17)	109.13 (122.87 ,96.84)	105.83 (93.89 ,119.18)	3.3 (-10.06, 15.23)
CARDIOVASCULAR MEDICATIONS	ALPHA BLOCKERS/RELATED	0.0601842	1.14 (0.99 ,1.31)	79.54 (90.57 ,69.8)	70.18 (61.55 ,79.96)	9.36 (-0.43, 17.99)
CARDIOVASCULAR MEDICATIONS	CALCIUM CHANNEL BLOCKERS	0.02956	1.16 (1.02 ,1.34)	84.38 (96.15 ,73.98)	72.91 (63.88 ,83.17)	11.46 (1.21, 20.49)
CARDIOVASCULAR MEDICATIONS	ANTIANGINALS	0.0355867	0.8 (0.65 ,0.99)	23.6 (29.02 ,19.19)	29.45 (23.96 ,36.18)	-5.85 (-12.58, -0.36)
CARDIOVASCULAR MEDICATIONS	ANTIARRHYTHMICS	0.382735	1.11 (0.88 ,1.41)	17.84 (22.6 ,14.08)	16.05 (12.66 ,20.34)	1.79 (-2.5, 5.18)
CARDIOVASCULAR MEDICATIONS	ANTILIPEMIC AGENTS	0.696442	0.97 (0.84 ,1.12)	123.62 (140.95 ,108.28)	126.9 (111.18 ,144.66)	-3.29 (-21.04, 12.44)
CARDIOVASCULAR MEDICATIONS	ANTIHYPERTENSIVE COMBINATIONS	0.757052	1.07 (0.71 ,1.6)	6.46 (9.68 ,4.31)	6.06 (4.04 ,9.08)	0.4 (-2.63, 2.42)
CARDIOVASCULAR MEDICATIONS	ANTIHYPERTENSIVES,OTHER	0.0410633	1.19 (1.01 ,1.41)	41.18 (48.57 ,34.89)	34.64 (29.34 ,40.89)	6.53 (0.29, 11.84)
CARDIOVASCULAR MEDICATIONS	PERIPHERAL VASODILATORS
CARDIOVASCULAR MEDICATIONS	SCLEROSING AGENTS
CARDIOVASCULAR MEDICATIONS	DIURETICS
CARDIOVASCULAR MEDICATIONS	THIAZIDES/RELATED DIURETICS	0.444203	0.93 (0.76 ,1.13)	29.3 (35.54 ,24.14)	31.6 (26.04 ,38.31)	-2.3 (-9.01, 3.26)
CARDIOVASCULAR MEDICATIONS	LOOP DIURETICS	0.753879	1.02 (0.9 ,1.16)	81.8 (92.13 ,72.59)	80.26 (71.21 ,90.4)	1.55 (-8.6, 10.6)
CARDIOVASCULAR MEDICATIONS	CARBONIC ANHYDRASE INHIBITOR DIURETICS	0.000401264	2.37 (1.47 ,3.82)	3.73 (6.01 ,2.32)	1.58 (0.98 ,2.54)	2.15 (1.19, 2.75)
CARDIOVASCULAR MEDICATIONS	POTASSIUM SPARING/COMBINATIONS DIURETICS	0.0195012	0.74 (0.58 ,0.95)	15.41 (19.71 ,12.04)	20.66 (16.15 ,26.4)	-5.25 (-10.99, -0.74)
CARDIOVASCULAR MEDICATIONS	DIURETICS,OTHER
CARDIOVASCULAR MEDICATIONS	ACE INHIBITORS	0.0360952	0.83 (0.7 ,0.99)	45.39 (53.57 ,38.43)	54.19 (45.91 ,63.91)	-8.8 (-18.52, -0.53)
CARDIOVASCULAR MEDICATIONS	ANGIOTENSIN II INHIBITOR	0.582319	1.06 (0.86 ,1.31)	24.14 (29.7 ,19.62)	22.78 (18.5 ,28.02)	1.37 (-3.88, 5.64)
CARDIOVASCULAR MEDICATIONS	DIRECT RENIN INHIBITOR
CARDIOVASCULAR MEDICATIONS	CARDIOVASCULAR AGENTS,OTHER	0.00340455	1.51 (1.15 ,1.99)	13.52 (17.77 ,10.29)	8.98 (6.83 ,11.81)	4.54 (1.71, 6.69)
DERMATOLOGICAL AGENTS	ANTI-INFECTIVE,TOPICAL
DERMATOLOGICAL AGENTS	ANTIBACTERIAL,TOPICAL	0.0760667	1.14 (0.99 ,1.32)	51.76 (59.62 ,44.92)	45.53 (39.49 ,52.46)	6.24 (-0.7, 12.27)
DERMATOLOGICAL AGENTS	ANTIFUNGAL,TOPICAL	3.78078e-06	1.34 (1.18 ,1.52)	81.2 (91.43 ,72.07)	61.23 (54.28 ,69.04)	19.97 (12.16, 26.93)
DERMATOLOGICAL AGENTS	ANTIVIRAL,TOPICAL
DERMATOLOGICAL AGENTS	ANTI-INFECTIVE,TOPICAL,OTHER	0.168909	0.75 (0.51 ,1.13)	5.34 (7.97 ,3.58)	7.07 (4.74 ,10.55)	-1.73 (-5.21, 0.6)
DERMATOLOGICAL AGENTS	ANTI-INFLAMMATORY,TOPICAL	0.0114649	1.17 (1.04 ,1.31)	96.44 (107.93 ,86.12)	83.33 (74.35 ,93.33)	13.11 (3.11, 22.09)
DERMATOLOGICAL AGENTS	ANTI-INFECTIVE/ANTI-INFLAMMATORY COMBINATIONS,TOPICAL
DERMATOLOGICAL AGENTS	SUN PROTECTANTS/SCREENS,TOPICAL	0.00139484	0.33 (0.17 ,0.65)	1.36 (2.7 ,0.69)	4.15 (2.09 ,8.22)	-2.79 (-6.86, -0.73)
DERMATOLOGICAL AGENTS	EMOLLIENTS	0.0551151	1.15 (1 ,1.33)	58.5 (67.26 ,50.85)	51 (44.31 ,58.68)	7.5 (-0.18, 14.19)
DERMATOLOGICAL AGENTS	SOAPS/SHAMPOOS/SOAP-FREE CLEANSERS	0.55001	1.14 (0.75 ,1.72)	6.58 (9.93 ,4.35)	5.8 (3.84 ,8.76)	0.78 (-2.18, 2.74)
DERMATOLOGICAL AGENTS	DEODORANTS/ANTIPERSPIRANTS,TOPICAL
DERMATOLOGICAL AGENTS	KERATOLYTICS/CAUSTICS,TOPICAL	0.785741	1.11 (0.52 ,2.41)	2.43 (5.25 ,1.13)	2.19 (1.01 ,4.72)	0.25 (-2.29, 1.42)
DERMATOLOGICAL AGENTS	ANTINEOPLASTIC,TOPICAL	0.0465135	0.54 (0.3 ,0.99)	2.32 (4.23 ,1.27)	4.27 (2.34 ,7.8)	-1.95 (-5.48, -0.02)
DERMATOLOGICAL AGENTS	ANALGESICS,TOPICAL	0.203134	1.12 (0.94 ,1.33)	38.69 (45.73 ,32.71)	34.69 (29.32 ,41.03)	3.99 (-2.34, 9.37)
DERMATOLOGICAL AGENTS	LOCAL ANESTHETICS,TOPICAL	4.46781e-11	1.51 (1.33 ,1.7)	90.56 (101.66 ,80.62)	61.12 (54.31 ,68.75)	29.44 (21.81, 36.25)
DERMATOLOGICAL AGENTS	ANTIACNE AGENTS
DERMATOLOGICAL AGENTS	ANTIACNE AGENTS,SYSTEMIC
DERMATOLOGICAL AGENTS	ANTIACNE AGENTS,TOPICAL	0.711282	0.92 (0.59 ,1.44)	4.71 (7.37 ,3.01)	5.13 (3.28 ,8.02)	-0.42 (-3.3, 1.43)
DERMATOLOGICAL AGENTS	ANTIPSORIATIC
DERMATOLOGICAL AGENTS	ANTIPSORIATICS,SYSTEMIC
DERMATOLOGICAL AGENTS	ANTIPSORIATICS,TOPICAL	0.932849	0.98 (0.55 ,1.73)	2.67 (4.74 ,1.5)	2.73 (1.54 ,4.85)	-0.07 (-2.19, 1.13)
DERMATOLOGICAL AGENTS	DERMATOLOGICALS,SYSTEMIC,OTHER
DERMATOLOGICAL AGENTS	DERMATOLOGICALS,TOPICAL OTHER	9.49745e-07	1.44 (1.24 ,1.66)	56.41 (64.92 ,48.99)	39.6 (34.34 ,45.63)	16.82 (10.78, 22.07)
DIAGNOSTIC AGENTS	RADIOLOGICAL/CONTRAST MEDIA
DIAGNOSTIC AGENTS	NON-IONIC CONTRAST MEDIA	0.389533	1.19 (0.8 ,1.78)	6.36 (9.47 ,4.27)	5.34 (3.58 ,7.95)	1.02 (-1.59, 2.78)
DIAGNOSTIC AGENTS	IONIC CONTRAST MEDIA	0.835161	0.95 (0.57 ,1.58)	3.43 (5.71 ,2.06)	3.62 (2.17 ,6.03)	-0.19 (-2.6, 1.26)
DIAGNOSTIC AGENTS	CONTRAST MEDIA, OTHER
DIAGNOSTIC AGENTS	RADIOPHARMACEUTICALS,DIAGNOSTIC
DIAGNOSTIC AGENTS	IMAGING AGENTS (IN VIVO) RADIOPHARMACEUTICALS
DIAGNOSTIC AGENTS	NON-IMAGING AGENTS RADIOPHARMACEUTICALS
DIAGNOSTIC AGENTS	DIAGNOSTIC ANTIGENS	0.0437082	1.27 (1.01 ,1.59)	19.16 (24.04 ,15.27)	15.17 (12.08 ,19.04)	3.99 (0.13, 7.08)
DIAGNOSTIC AGENTS	DIAGNOSTICS,OTHER	0.00151737	1.28 (1.1 ,1.49)	62.29 (72.13 ,53.76)	49.06 (42.3 ,56.87)	13.23 (5.42, 20)
GASTROINTESTINAL MEDICATIONS	ANTACIDS
GASTROINTESTINAL MEDICATIONS	ALUMINUM CONTAINING ANTACIDS
GASTROINTESTINAL MEDICATIONS	ALUMINUM/CALCIUM/MAGNESIUM CONTAINING ANTACIDS
GASTROINTESTINAL MEDICATIONS	ALUMINUM/MAGNESIUM CONTAINING ANTACIDS
GASTROINTESTINAL MEDICATIONS	ALUMINUM/MAGNESIUM/SODIUM BICARBONATE CONTAINING ANTACIDS
GASTROINTESTINAL MEDICATIONS	CALCIUM CONTAINING ANTACIDS
GASTROINTESTINAL MEDICATIONS	CALCIUM/MAGNESIUM CONTAINING ANTACIDS
GASTROINTESTINAL MEDICATIONS	MAGALDRATE CONTAINING ANTACIDS
GASTROINTESTINAL MEDICATIONS	MAGNESIUM CONTAINING ANTACIDS	0.0011864	1.54 (1.19 ,1.99)	15.3 (19.77 ,11.83)	9.99 (7.72 ,12.93)	5.3 (2.37, 7.58)
GASTROINTESTINAL MEDICATIONS	MAGNESIUM/SODIUM BICARBONATE CONTAINING ANTACIDS
GASTROINTESTINAL MEDICATIONS	SODIUM BICARBONATE CONTAINING ANTACIDS	0.00101989	1.66 (1.23 ,2.25)	12.23 (16.53 ,9.05)	7.38 (5.45 ,9.98)	4.86 (2.26, 6.78)
GASTROINTESTINAL MEDICATIONS	ANTACIDS,OTHER	0.0115987	1.33 (1.07 ,1.65)	21.85 (27.13 ,17.59)	16.53 (13.3 ,20.53)	5.32 (1.32, 8.55)
GASTROINTESTINAL MEDICATIONS	LAXATIVES
GASTROINTESTINAL MEDICATIONS	BULK-FORMING LAXATIVES	0.153967	1.19 (0.94 ,1.5)	17.99 (22.68 ,14.26)	15.19 (12.04 ,19.16)	2.8 (-1.17, 5.95)
GASTROINTESTINAL MEDICATIONS	HYPEROSMOTIC LAXATIVES	7.33247e-15	1.43 (1.31 ,1.57)	179.82 (195.11 ,165.6)	129.17 (118.66 ,140.53)	50.65 (39.29, 61.16)
GASTROINTESTINAL MEDICATIONS	LUBRICANT LAXATIVES
GASTROINTESTINAL MEDICATIONS	STIMULANT LAXATIVES	2.69531e-16	1.5 (1.36 ,1.65)	149.67 (163.53 ,136.88)	102.65 (93.66 ,112.45)	47.02 (37.22, 56.01)
GASTROINTESTINAL MEDICATIONS	STOOL SOFTENER	0.0349974	1.14 (1.01 ,1.29)	78.71 (88.56 ,69.92)	69.29 (61.52 ,78.01)	9.42 (0.7, 17.2)
GASTROINTESTINAL MEDICATIONS	CARBON DIOXIDE-RELEASING LAXATIVES
GASTROINTESTINAL MEDICATIONS	ANTIDIARRHEAL AGENTS	0.526625	1.05 (0.9 ,1.23)	43.16 (50.17 ,37.11)	41.11 (35.34 ,47.79)	2.05 (-4.63, 7.82)
GASTROINTESTINAL MEDICATIONS	LAXATIVES,OTHER
GASTROINTESTINAL MEDICATIONS	ANTIULCER AGENTS
GASTROINTESTINAL MEDICATIONS	HISTAMINE ANTAGONISTS	0.0541101	1.16 (1 ,1.36)	47.76 (55.44 ,41.12)	41.23 (35.48 ,47.88)	6.53 (-0.12, 12.28)
GASTROINTESTINAL MEDICATIONS	PROTECTANTS,ULCER	0.0342256	1.53 (1.03 ,2.27)	8.46 (12.52 ,5.71)	5.54 (3.74 ,8.2)	2.92 (0.26, 4.72)
GASTROINTESTINAL MEDICATIONS	H. PYLORI AGENTS
GASTROINTESTINAL MEDICATIONS	ANTIULCER AGENTS,OTHER
GASTROINTESTINAL MEDICATIONS	TUMOR NECROSIS FACTOR BLOCKER
GASTROINTESTINAL MEDICATIONS	DIGESTANTS	0.219996	1.38 (0.82 ,2.31)	3.98 (6.66 ,2.38)	2.88 (1.72 ,4.82)	1.1 (-0.85, 2.26)
GASTROINTESTINAL MEDICATIONS	EMETICS
GASTROINTESTINAL MEDICATIONS	ANTIEMETICS	0.341685	1.07 (0.93 ,1.22)	59.32 (67.62 ,52.01)	55.66 (48.79 ,63.46)	3.66 (-4.14, 10.53)
GASTROINTESTINAL MEDICATIONS	APPETITE SUPPRESSANTS
GASTROINTESTINAL MEDICATIONS	CENTRALLY-ACTING APPETITE SUPPRESSANTS
GASTROINTESTINAL MEDICATIONS	BULKING AGENT,APPETITE SUPPRESSANTS
GASTROINTESTINAL MEDICATIONS	APPETITE SUPPRESSANTS,OTHER
GASTROINTESTINAL MEDICATIONS	ANTIMUSCARINICS/ANTISPASMODICS
GASTROINTESTINAL MEDICATIONS	ANTIMUSCARINICS/ANTISPASMODICS
GASTROINTESTINAL MEDICATIONS	ANTIMUSCARINIC/ANTIPASMODIC COMBINATIONS
GASTROINTESTINAL MEDICATIONS	GASTRIC MEDICATIONS,OTHER	7.82422e-05	1.26 (1.12 ,1.4)	139.92 (155.23 ,126)	113.2 (101.78 ,125.8)	26.72 (14.12, 38.14)
GENITOURINARY MEDICATIONS	ANALGESICS,URINARY	0.634956	1.09 (0.77 ,1.54)	8.14 (11.48 ,5.78)	7.49 (5.31 ,10.56)	0.65 (-2.42, 2.83)
GENITOURINARY MEDICATIONS	ANTISPASMODICS,URINARY
GENITOURINARY MEDICATIONS	ANTISPASMODICS,URINARY	0.702971	0.94 (0.69 ,1.29)	10.26 (14 ,7.51)	10.9 (7.98 ,14.87)	-0.64 (-4.61, 2.28)
GENITOURINARY MEDICATIONS	ANTISPASMODICS,URINARY,OTHER
GENITOURINARY MEDICATIONS	ANTI-INFECTIVES,VAGINAL
GENITOURINARY MEDICATIONS	CONTRACEPTIVES,VAGINAL/TOPICAL
GENITOURINARY MEDICATIONS	ESTROGENS,VAGINAL
GENITOURINARY MEDICATIONS	OXYTOCICS
GENITOURINARY MEDICATIONS	GENITO-URINARY AGENTS,OTHER	0.424218	1.09 (0.89 ,1.34)	29.68 (36.34 ,24.22)	27.32 (22.29 ,33.46)	2.36 (-3.79, 7.39)
HORMONES/SYNTHETICS/MODIFIERS	ADRENAL CORTICOSTERIODS
HORMONES/SYNTHETICS/MODIFIERS	GLUCOCORTICOIDS	0.494926	1.04 (0.93 ,1.17)	85.61 (95.91 ,76.37)	82.28 (73.38 ,92.2)	3.33 (-6.59, 12.23)
HORMONES/SYNTHETICS/MODIFIERS	MINERALOCORTICOIDS	0.00422754	3.04 (1.42 ,6.53)	2.56 (5.48 ,1.19)	0.84 (0.39 ,1.8)	1.72 (0.76, 2.17)
HORMONES/SYNTHETICS/MODIFIERS	ANDROGENS/ANABOLICS	0.248539	1.58 (0.73 ,3.41)	2.1 (4.54 ,0.97)	1.33 (0.62 ,2.89)	0.77 (-0.78, 1.48)
HORMONES/SYNTHETICS/MODIFIERS	CONTRACEPTIVES,SYSTEMIC
HORMONES/SYNTHETICS/MODIFIERS	ESTROGENS
HORMONES/SYNTHETICS/MODIFIERS	GONADOTROPINS
HORMONES/SYNTHETICS/MODIFIERS	BLOOD GLUCOSE REGULATION AGENTS
HORMONES/SYNTHETICS/MODIFIERS	INSULIN	2.04506e-08	1.44 (1.27 ,1.64)	88.17 (99.55 ,78.03)	62.07 (54.84 ,70.21)	26.1 (17.96, 33.33)
HORMONES/SYNTHETICS/MODIFIERS	ORAL HYPOGLYCEMIC AGENTS,ORAL	0.0474799	1.23 (1 ,1.51)	34.11 (41.72 ,27.86)	27.8 (22.7 ,34.03)	6.31 (0.08, 11.41)
HORMONES/SYNTHETICS/MODIFIERS	ANTIHYPOGLYCEMICS	0.199668	1.16 (0.93 ,1.46)	20.12 (25.19 ,16.07)	17.37 (13.86 ,21.75)	2.75 (-1.62, 6.26)
HORMONES/SYNTHETICS/MODIFIERS	HYPOGLYCEMIC AGENTS,OTHER	0.662003	1.11 (0.7 ,1.74)	4.61 (7.26 ,2.93)	4.17 (2.65 ,6.56)	0.44 (-1.94, 1.96)
HORMONES/SYNTHETICS/MODIFIERS	PARATHYROID
HORMONES/SYNTHETICS/MODIFIERS	PITUITARY
HORMONES/SYNTHETICS/MODIFIERS	ANTERIOR PITUITARY
HORMONES/SYNTHETICS/MODIFIERS	POSTERIOR PITUITARY
HORMONES/SYNTHETICS/MODIFIERS	PROGESTINS	0.240459	0.73 (0.43 ,1.24)	2.58 (4.39 ,1.52)	3.55 (2.09 ,6.03)	-0.97 (-3.45, 0.5)
HORMONES/SYNTHETICS/MODIFIERS	THYROID MODIFIERS
HORMONES/SYNTHETICS/MODIFIERS	THYROID SUPPLEMENTS	0.0267187	0.67 (0.47 ,0.96)	7.21 (10.26 ,5.06)	10.74 (7.55 ,15.28)	-3.53 (-8.07, -0.34)
HORMONES/SYNTHETICS/MODIFIERS	ANTITHYROID AGENTS
HORMONES/SYNTHETICS/MODIFIERS	PROSTAGLANDINS	0.541482	0.83 (0.45 ,1.52)	2.09 (3.84 ,1.13)	2.52 (1.37 ,4.64)	-0.44 (-2.55, 0.72)
HORMONES/SYNTHETICS/MODIFIERS	HORMONES/SYNTHETICS/MODIFIERS,OTHER	0.236439	1.13 (0.92 ,1.38)	27.93 (33.96 ,22.95)	24.81 (20.39 ,30.18)	3.12 (-2.25, 7.54)
IMMUNOLOGICAL AGENTS	VACCINES	8.31623e-21	2.04 (1.76 ,2.37)	55.02 (63.6 ,47.56)	27.35 (23.59 ,31.68)	27.67 (23.33, 31.42)
IMMUNOLOGICAL AGENTS	TOXOIDS	0.64771	1.27 (0.45 ,3.56)	0.99 (2.78 ,0.35)	0.78 (0.28 ,2.19)	0.21 (-1.19, 0.71)
IMMUNOLOGICAL AGENTS	VACCINES/TOXOIDS, OTHER	0.147001	1.46 (0.88 ,2.43)	4.48 (7.44 ,2.69)	3.07 (1.85 ,5.11)	1.4 (-0.63, 2.63)
IMMUNOLOGICAL AGENTS	ANTIVENINS/ANTITOXINS
IMMUNOLOGICAL AGENTS	IMMUNE SERUMS
IMMUNOLOGICAL AGENTS	IMMUNOGLOBULINS
IMMUNOLOGICAL AGENTS	IMMUNE SUPPRESSANTS	0.423566	0.75 (0.37 ,1.51)	2.17 (4.36 ,1.08)	2.89 (1.43 ,5.8)	-0.72 (-3.63, 0.73)
IMMUNOLOGICAL AGENTS	IMMUNE STIMULANTS
IMMUNOLOGICAL AGENTS	IMMUNOLOGICAL AGENTS,OTHER	0.206173	0.67 (0.36 ,1.25)	2.4 (4.49 ,1.28)	3.6 (1.92 ,6.74)	-1.2 (-4.34, 0.48)
INTRAPLEURAL MEDICATIONS	INTRAPLEURAL SCLEROSING AGENTS
INTRAPLEURAL MEDICATIONS	INTRAPLEURAL AGENTS,OTHER
IRRIGATION/DIALYSIS SOLUTIONS	IRRIGATION SOLUTIONS	0.00120543	1.59 (1.2 ,2.1)	13.44 (17.74 ,10.18)	8.49 (6.43 ,11.22)	4.95 (2.23, 7.01)
IRRIGATION/DIALYSIS SOLUTIONS	PERITONEAL DIALYSIS SOLUTIONS
IRRIGATION/DIALYSIS SOLUTIONS	HEMODIALYSIS SOLUTIONS
IRRIGATION/DIALYSIS SOLUTIONS	IRRIGATION/DIALYSIS SOLUTIONS,OTHER
MUSCULOSKELETAL MEDICATIONS	ANTIRHEUMATICS
MUSCULOSKELETAL MEDICATIONS	SALICYLATES,ANTIRHEUMATIC
MUSCULOSKELETAL MEDICATIONS	NONSALICYLATE NSAIs,ANTIRHEUMATIC	0.1784	0.91 (0.78 ,1.05)	60.23 (69.35 ,52.28)	66.36 (57.62 ,76.37)	-6.13 (-16.14, 2.61)
MUSCULOSKELETAL MEDICATIONS	ANTIMALARIALS,ANTIRHEUMATIC
MUSCULOSKELETAL MEDICATIONS	PENICILLAMINE
MUSCULOSKELETAL MEDICATIONS	CYTOTOXICS,ANTIRHEUMATIC
MUSCULOSKELETAL MEDICATIONS	GOLD COMPOUNDS,ANTIRHEUMATIC
MUSCULOSKELETAL MEDICATIONS	ANTIRHEUMATICS,OTHER	0.63904	1.21 (0.55 ,2.64)	1.7 (3.72 ,0.78)	1.41 (0.64 ,3.08)	0.29 (-1.38, 1.06)
MUSCULOSKELETAL MEDICATIONS	SKELETAL MUSCLE RELAXANTS	0.143858	1.13 (0.96 ,1.32)	48.11 (56.18 ,41.18)	42.84 (36.65 ,50.05)	5.27 (-1.94, 11.46)
MUSCULOSKELETAL MEDICATIONS	VESICULAR MONOAMINE TRANSPORT TYPE 2 BLOCKER
MUSCULOSKELETAL MEDICATIONS	NEUROMUSCULAR BLOCKING AGENTS	0.00015036	2.49 (1.55 ,4)	4.96 (7.94 ,3.09)	1.99 (1.24 ,3.19)	2.96 (1.76, 3.71)
MUSCULOSKELETAL MEDICATIONS	ANTIGOUT AGENTS	0.537229	1.09 (0.82 ,1.45)	14.64 (19.39 ,11.05)	13.4 (10.11 ,17.75)	1.24 (-3.11, 4.53)
MUSCULOSKELETAL MEDICATIONS	MUSCULOSKELETAL AGENTS,OTHER
NASAL AND THROAT AGENTS,TOPICAL	DECONGESTANTS,NASAL	0.0319943	1.5 (1.04 ,2.16)	8.46 (12.2 ,5.87)	5.67 (3.93 ,8.18)	2.8 (0.29, 4.54)
NASAL AND THROAT AGENTS,TOPICAL	ANTI-INFLAMMATORIES,NASAL	0.000220558	0.73 (0.62 ,0.86)	38.64 (45.48 ,32.81)	52.51 (44.64 ,61.72)	-13.87 (-23.08, -6)
NASAL AND THROAT AGENTS,TOPICAL	ANESTHETICS,MUCOSAL	0.0557838	1.2 (1 ,1.44)	32.84 (39.31 ,27.42)	27.54 (22.99 ,32.98)	5.3 (-0.14, 9.85)
NASAL AND THROAT AGENTS,TOPICAL	ANTIHISTAMINES,NASAL	0.19945	1.74 (0.75 ,4.07)	1.56 (3.65 ,0.67)	0.9 (0.38 ,2.1)	0.67 (-0.53, 1.18)
NASAL AND THROAT AGENTS,TOPICAL	NASAL AND THROAT,TOPICAL,OTHER	0.193812	1.12 (0.94 ,1.33)	36.73 (43.45 ,31.03)	32.84 (27.74 ,38.87)	3.88 (-2.14, 8.99)
OPHTHALMIC AGENTS	ANTIGLAUCOMA MEDICATIONS
OPHTHALMIC AGENTS	BETA-BLOCKERS,TOPICAL OPHTHALMIC	0.00131027	0.3 (0.14 ,0.63)	1.43 (2.97 ,0.69)	4.75 (2.28 ,9.87)	-3.32 (-8.44, -0.85)
OPHTHALMIC AGENTS	MIOTICS,TOPICAL OPHTHALMIC
OPHTHALMIC AGENTS	ADRENERGICS,TOPICAL OPHTHALMIC
OPHTHALMIC AGENTS	ANTIGLAUCOMA COMBINATIONS,TOPICAL OPHTHALMIC	0.626746	1.15 (0.66 ,1.99)	3.82 (6.62 ,2.2)	3.33 (1.92 ,5.78)	0.49 (-1.96, 1.9)
OPHTHALMIC AGENTS	BETA-BLOCKERS,SYSTEMIC OPHTHALMIC
OPHTHALMIC AGENTS	ANTIGLAUCOMA,OTHER	0.702194	1.08 (0.73 ,1.59)	8.15 (11.99 ,5.54)	7.56 (5.14 ,11.12)	0.59 (-2.97, 3.02)
OPHTHALMIC AGENTS	CARBONIC ANHYDRASE INHIBITORS,SYSTEMIC OPHTHALMIC
OPHTHALMIC AGENTS	OSMOTIC AGENTS,SYSTEMIC OPHTHALMIC
OPHTHALMIC AGENTS	ANTI-INFECTIVE,TOPICAL OPHTHALMIC
OPHTHALMIC AGENTS	ANTIBACTERIALS,TOPICAL OPHTHALMIC	0.141084	0.83 (0.65 ,1.06)	17.24 (21.93 ,13.55)	20.65 (16.24 ,26.26)	-3.41 (-9.02, 1)
OPHTHALMIC AGENTS	ANTI-INFECTIVE,TOPICAL OPHTHALMIC,OTHER	0.0089074	0.44 (0.24 ,0.81)	2.04 (3.77 ,1.1)	4.63 (2.5 ,8.56)	-2.59 (-6.53, -0.47)
OPHTHALMIC AGENTS	ANTIFUNGALS,TOPICAL OPHTHALMIC
OPHTHALMIC AGENTS	ANTIVIRALS,TOPICAL OPHTHALMIC
OPHTHALMIC AGENTS	ANTI-INFLAMMATORIES,TOPICAL OPHTHALMIC	0.199846	0.84 (0.65 ,1.1)	15.29 (19.84 ,11.78)	18.13 (13.98 ,23.52)	-2.84 (-8.22, 1.32)
OPHTHALMIC AGENTS	ANTI-INFECTIVE/ANTI-INFLAMMATORY COMBINATIONS,TOPICAL OPHTHALMIC	0.520047	0.8 (0.4 ,1.58)	2.23 (4.42 ,1.13)	2.79 (1.41 ,5.53)	-0.56 (-3.3, 0.82)
OPHTHALMIC AGENTS	CONTACT LENS SOLUTIONS
OPHTHALMIC AGENTS	EYE WASHES/LUBRICANTS	0.000123256	1.3 (1.14 ,1.48)	73.09 (83.07 ,64.27)	56.78 (49.87 ,64.61)	16.31 (8.48, 23.22)
OPHTHALMIC AGENTS	MYDRIATICS/CYCLOPLEGICS,TOPICAL OPHTHALMIC	0.541319	0.88 (0.58 ,1.33)	5.05 (7.63 ,3.34)	5.74 (3.8 ,8.67)	-0.69 (-3.62, 1.25)
OPHTHALMIC AGENTS	ANESTHETICS,TOPICAL OPHTHALMIC
OPHTHALMIC AGENTS	DECONGESTANTS,TOPICAL OPHTHALMIC
OPHTHALMIC AGENTS	OPHTHALMICS,OTHER	0.472424	0.88 (0.63 ,1.24)	8.72 (12.2 ,6.23)	9.86 (7.05 ,13.8)	-1.14 (-5.08, 1.67)
DENTAL AND ORAL AGENTS,TOPICAL	CARIOSTATICS,TOPICAL	0.0774698	0.7 (0.46 ,1.04)	5.93 (8.87 ,3.96)	8.53 (5.7 ,12.75)	-2.6 (-6.82, 0.23)
DENTAL AND ORAL AGENTS,TOPICAL	DENTAL PROTECTANTS
DENTAL AND ORAL AGENTS,TOPICAL	DENTIFRICES
DENTAL AND ORAL AGENTS,TOPICAL	DENTURE ADHESIVES
DENTAL AND ORAL AGENTS,TOPICAL	MOUTHWASHES	4.09975e-07	1.57 (1.32 ,1.87)	35.42 (42.03 ,29.83)	22.71 (19.11 ,26.98)	12.71 (8.44, 16.31)
DENTAL AND ORAL AGENTS,TOPICAL	DENTAL AND ORAL AGENTS,TOPICAL,OTHER
OTIC AGENTS	ANTI-INFECTIVE,TOPICAL OTIC
OTIC AGENTS	ANTIBACTERIALS,TOPICAL OTIC
OTIC AGENTS	ANTIFUNGALS,TOPICAL OTIC
OTIC AGENTS	ANTI-INFECTIVES,TOPICAL OTIC OTHER
OTIC AGENTS	ANTI-INFLAMMATORIES,TOPICAL OTIC
OTIC AGENTS	ANTI-INFECTIVE/ANTI-INFLAMMATORY COMBINATIONS,TOPICAL OTIC	0.121576	0.73 (0.48 ,1.09)	4.87 (7.29 ,3.25)	6.7 (4.47 ,10.03)	-1.83 (-5.16, 0.4)
OTIC AGENTS	CERUMINOLYTICS	0.992021	1 (0.77 ,1.31)	14.92 (19.44 ,11.44)	14.94 (11.46 ,19.47)	-0.02 (-4.55, 3.46)
OTIC AGENTS	ANALGESICS,TOPICAL OTIC
OTIC AGENTS	OTIC AGENTS,OTHER
RESPIRATORY TRACT MEDICATIONS	ANTIASTHMA/BRONCHODILATORS
RESPIRATORY TRACT MEDICATIONS	ANTI-INFLAMMATORIES,INHALATION	0.453536	0.88 (0.64 ,1.22)	8.7 (11.99 ,6.31)	9.83 (7.13 ,13.55)	-1.14 (-4.85, 1.57)
RESPIRATORY TRACT MEDICATIONS	BRONCHODILATORS,SYMPATHOMIMETIC,INHALATION	0.850552	0.99 (0.89 ,1.1)	121.61 (134.29 ,110.04)	122.77 (111.11 ,135.57)	-1.17 (-13.96, 10.5)
RESPIRATORY TRACT MEDICATIONS	BRONCHODILATORS,SYMPATHOMIMETIC,ORAL
RESPIRATORY TRACT MEDICATIONS	BRONCHODILATORS,XANTHINE-DERIVATIVE
RESPIRATORY TRACT MEDICATIONS	BRONCHODILATORS,ANTICHOLINERGIC	2.54152e-05	0.72 (0.62 ,0.84)	44.23 (51.37 ,38.06)	60.96 (52.52 ,70.7)	-16.73 (-26.48, -8.29)
RESPIRATORY TRACT MEDICATIONS	ANTIASTHMA,ANTILEUKOTRIENES
RESPIRATORY TRACT MEDICATIONS	ANTIASTHMA,OTHER	2.03045e-07	0.72 (0.64 ,0.81)	71.76 (80.87 ,63.63)	98.38 (87.39 ,110.67)	-26.63 (-38.92, -15.63)
RESPIRATORY TRACT MEDICATIONS	DECONGESTANTS,SYSTEMIC
RESPIRATORY TRACT MEDICATIONS	ANTITUSSIVES/EXPECTORANTS
RESPIRATORY TRACT MEDICATIONS	OPIOID-CONTAINING ANTITUSSIVES/EXPECTORANTS	0.000865981	0.49 (0.32 ,0.75)	4.14 (6.28 ,2.73)	8.41 (5.54 ,12.75)	-4.27 (-8.61, -1.4)
RESPIRATORY TRACT MEDICATIONS	NON-OPIOID-CONTAINING ANTITUSSIVES/EXPECTORANTS	0.463387	0.96 (0.85 ,1.08)	84.62 (94.98 ,75.34)	88.36 (78.69 ,99.15)	-3.74 (-14.53, 5.93)
RESPIRATORY TRACT MEDICATIONS	MUCOLYTICS	0.00198441	1.82 (1.25 ,2.66)	8.19 (11.94 ,5.61)	4.51 (3.09 ,6.58)	3.68 (1.61, 5.1)
RESPIRATORY TRACT MEDICATIONS	COLD REMEDIES,COMBINATIONS
RESPIRATORY TRACT MEDICATIONS	ANTIHISTAMINE/DECONGESTANT
RESPIRATORY TRACT MEDICATIONS	ANTIHISTAMINE/DECONGESTANT/ANTITUSSIVE
RESPIRATORY TRACT MEDICATIONS	ANTIHISTAMINE/DECONGESTANT/EXPECTORANT
RESPIRATORY TRACT MEDICATIONS	ANTIHISTAMINE/DECONGESTANT/ANTITUSSIVE/EXPECTORANT
RESPIRATORY TRACT MEDICATIONS	ANTIHISTAMINE/DECONGESTANT/ANTITUSSIVE/EXPECTORANT/ANALGESIC
RESPIRATORY TRACT MEDICATIONS	ANTIHISTAMINE/DECONGESTANT/ANTITUSSIVE/ANALGESIC
RESPIRATORY TRACT MEDICATIONS	ANTIHISTAMINE/ANTITUSSIVE
RESPIRATORY TRACT MEDICATIONS	ANTIHISTAMINE/ANTITUSSIVE/EXPECTORANT
RESPIRATORY TRACT MEDICATIONS	ANTIHISTAMINE/ANTITUSSIVE/ANALGESIC
RESPIRATORY TRACT MEDICATIONS	ANTITUSSIVE/ANTIMUSCARINIC
RESPIRATORY TRACT MEDICATIONS	ANTITUSSIVE/BRONCHODILATOR
RESPIRATORY TRACT MEDICATIONS	DECONGESTANT/ANTITUSSIVE
RESPIRATORY TRACT MEDICATIONS	DECONGESTANT/ANTITUSSIVE/EXPECTORANT
RESPIRATORY TRACT MEDICATIONS	DECONGESTANT/ANTITUSSIVE/EXPECTORANT/ANALGESIC
RESPIRATORY TRACT MEDICATIONS	DECONGESTANT/ANTITUSSIVE/ANALGESIC
RESPIRATORY TRACT MEDICATIONS	DECONGESTANT/EXPECTORANT
RESPIRATORY TRACT MEDICATIONS	COLD REMEDIES,OTHER
RESPIRATORY TRACT MEDICATIONS	NON-ANESTHETIC GASES
RESPIRATORY TRACT MEDICATIONS	RESPIRATORY AGENTS,OTHER	0.594807	1.11 (0.76 ,1.61)	7.03 (10.18 ,4.85)	6.36 (4.39 ,9.21)	0.67 (-2.18, 2.64)
RECTAL,LOCAL	ANTI-INFLAMMATORIES,RECTAL
RECTAL,LOCAL	HEMORRHOIDAL PREPARATIONS,RECTAL
RECTAL,LOCAL	HEMORRHOIDAL PREPARATIONS WITHOUT STEROID	0.0477632	1.62 (1.01 ,2.61)	5 (8.03 ,3.11)	3.09 (1.92 ,4.97)	1.91 (0.02, 3.08)
RECTAL,LOCAL	HEMORRHOIDAL PREPARATIONS WITH STEROID	0.0427515	1.45 (1.01 ,2.08)	7.08 (10.12 ,4.94)	4.88 (3.41 ,6.99)	2.19 (0.09, 3.66)
RECTAL,LOCAL	LAXATIVES,RECTAL	2.62821e-05	1.39 (1.19 ,1.61)	47.05 (54.58 ,40.55)	34.17 (29.42 ,39.68)	12.88 (7.37, 17.64)
RECTAL,LOCAL	RECTAL,LOCAL OTHER
THERAPEUTIC NUTRIENTS/MINERALS/ELECTROLYTES	IV SOLUTIONS
THERAPEUTIC NUTRIENTS/MINERALS/ELECTROLYTES	IV SOLUTIONS WITHOUT ELECTROLYTES	9.17512e-06	1.68 (1.34 ,2.11)	22.24 (27.89 ,17.73)	13.3 (10.59 ,16.7)	8.94 (5.54, 11.65)
THERAPEUTIC NUTRIENTS/MINERALS/ELECTROLYTES	IV SOLUTIONS WITH ELECTROLYTES	0.21815	1.44 (0.81 ,2.55)	3.58 (6.35 ,2.01)	2.49 (1.4 ,4.43)	1.08 (-0.85, 2.17)
THERAPEUTIC NUTRIENTS/MINERALS/ELECTROLYTES	ENTERAL NUTRITION	0.000122832	1.36 (1.16 ,1.6)	44.42 (51.82 ,38.06)	32.79 (28.07 ,38.3)	11.63 (6.12, 16.35)
THERAPEUTIC NUTRIENTS/MINERALS/ELECTROLYTES	LIPID SUPPLEMENTS
THERAPEUTIC NUTRIENTS/MINERALS/ELECTROLYTES	ELECTROLYTES/MINERALS
THERAPEUTIC NUTRIENTS/MINERALS/ELECTROLYTES	IRON	0.129099	1.11 (0.97 ,1.28)	61.29 (70.11 ,53.55)	55.21 (48.22 ,63.18)	6.08 (-1.89, 13.07)
THERAPEUTIC NUTRIENTS/MINERALS/ELECTROLYTES	CALCIUM	0.179495	1.15 (0.94 ,1.4)	27.21 (33.18 ,22.3)	23.75 (19.46 ,28.97)	3.46 (-1.76, 7.75)
THERAPEUTIC NUTRIENTS/MINERALS/ELECTROLYTES	POTASSIUM	3.06841e-06	1.29 (1.16 ,1.44)	110.59 (122.4 ,99.85)	86.64 (78.13 ,96.03)	23.95 (14.56, 32.47)
THERAPEUTIC NUTRIENTS/MINERALS/ELECTROLYTES	SODIUM	0.169281	1.54 (0.83 ,2.83)	2.99 (5.51 ,1.62)	1.95 (1.06 ,3.59)	1.04 (-0.6, 1.94)
THERAPEUTIC NUTRIENTS/MINERALS/ELECTROLYTES	ZINC	4.17531e-35	8.52 (6.07 ,11.96)	25.85 (36.11 ,18.48)	3.07 (2.19 ,4.31)	22.78 (21.54, 23.66)
THERAPEUTIC NUTRIENTS/MINERALS/ELECTROLYTES	MAGNESIUM	0.00319329	1.22 (1.07 ,1.4)	63.77 (72.54 ,56.04)	52.49 (46.09 ,59.75)	11.28 (4.02, 17.69)
THERAPEUTIC NUTRIENTS/MINERALS/ELECTROLYTES	FLUORIDE
THERAPEUTIC NUTRIENTS/MINERALS/ELECTROLYTES	PHOSPHORUS	1.19409e-05	1.61 (1.3 ,1.98)	26.17 (32.24 ,21.23)	16.38 (13.28 ,20.21)	9.78 (5.96, 12.89)
THERAPEUTIC NUTRIENTS/MINERALS/ELECTROLYTES	BICARBONATES	0.000435844	2.24 (1.43 ,3.52)	7.23 (11.31 ,4.61)	3.23 (2.06 ,5.06)	4 (2.17, 5.17)
THERAPEUTIC NUTRIENTS/MINERALS/ELECTROLYTES	CITRATES	0.791628	1.08 (0.6 ,1.94)	3.01 (5.41 ,1.68)	2.78 (1.55 ,5)	0.23 (-1.98, 1.46)
THERAPEUTIC NUTRIENTS/MINERALS/ELECTROLYTES	ELECTROLYTES/MINERALS,COMBINATIONS	1	1 (0.46 ,2.16)	1.49 (3.22 ,0.69)	1.49 (0.69 ,3.22)	0 (-1.73, 0.8)
THERAPEUTIC NUTRIENTS/MINERALS/ELECTROLYTES	ELECTROLYTES/MINERALS,OTHER
THERAPEUTIC NUTRIENTS/MINERALS/ELECTROLYTES	AMINO ACIDS/PROTEINS
THERAPEUTIC NUTRIENTS/MINERALS/ELECTROLYTES	AMINO ACIDS/PROTEINS,PARENTERAL,WITHOUT ADDED ELECTROLYTES
THERAPEUTIC NUTRIENTS/MINERALS/ELECTROLYTES	AMINO ACIDS/PROTEINS,PARENTERAL,WITH ADDED ELECTROLYTES
THERAPEUTIC NUTRIENTS/MINERALS/ELECTROLYTES	AMINO ACIDS/PROTEINS,ORAL
THERAPEUTIC NUTRIENTS/MINERALS/ELECTROLYTES	AMINO ACIDS/PROTEINS,OTHER
THERAPEUTIC NUTRIENTS/MINERALS/ELECTROLYTES	THERAPEUTIC NUTRIENTS/MINERALS/ELECTROLYES,OTHER
VITAMINS	VITAMIN A
VITAMINS	VITAMIN B
VITAMINS	CYANOCOBALAMIN	0.0060879	1.27 (1.07 ,1.51)	40.95 (48.4 ,34.63)	32.38 (27.36 ,38.3)	8.57 (2.65, 13.59)
VITAMINS	FOLIC ACID/LEUCOVORIN	0.00315516	1.3 (1.09 ,1.55)	40.43 (47.99 ,34.04)	31.19 (26.24 ,37.06)	9.24 (3.37, 14.19)
VITAMINS	NICOTINIC ACID
VITAMINS	PYRIDOXINE	0.897177	0.96 (0.48 ,1.91)	1.9 (3.78 ,0.95)	1.99 (1 ,3.96)	-0.09 (-2.06, 0.9)
VITAMINS	THIAMINE	3.91863e-05	1.53 (1.25 ,1.88)	29.55 (36.08 ,24.19)	19.4 (15.86 ,23.71)	10.15 (5.84, 13.69)
VITAMINS	RIBOFLAVIN
VITAMINS	PANTOTHENIC ACID
VITAMINS	VITAMIN B,OTHER	0.201385	1.42 (0.83 ,2.45)	3.48 (5.97 ,2.03)	2.45 (1.42 ,4.2)	1.03 (-0.72, 2.06)
VITAMINS	VITAMIN C	2.83954e-30	3.04 (2.51 ,3.68)	43.2 (52.03 ,35.83)	14.41 (11.93 ,17.41)	28.78 (25.78, 31.27)
VITAMINS	VITAMIN D
VITAMINS	CALCIFEDIOL
VITAMINS	CALCITRIOL	0.0958364	0.65 (0.4 ,1.08)	3.26 (5.38 ,1.97)	4.99 (3.02 ,8.24)	-1.73 (-4.98, 0.24)
VITAMINS	DIHYDROTACHYSTEROL
VITAMINS	ERGOCALCIFEROL	0.106682	0.84 (0.68 ,1.04)	22.67 (27.93 ,18.39)	26.92 (21.84 ,33.14)	-4.25 (-10.48, 0.82)
VITAMINS	VITAMIN D,OTHER	8.88635e-05	1.28 (1.13 ,1.45)	96.8 (108.91 ,85.97)	76.31 (67.69 ,85.98)	20.49 (10.82, 29.12)
VITAMINS	VITAMIN E
VITAMINS	VITAMIN K
VITAMINS	MENADIOL
VITAMINS	PHYTONADIONE	0.471611	0.85 (0.55 ,1.32)	4.99 (7.76 ,3.2)	5.87 (3.77 ,9.13)	-0.88 (-4.14, 1.22)
VITAMINS	VITAMIN K,OTHER
VITAMINS	VITAMINS,COMBINATIONS
VITAMINS	MULTIVITAMINS	0.594156	1.06 (0.87 ,1.29)	28.29 (34.42 ,23.23)	26.81 (22.02 ,32.64)	1.47 (-4.35, 6.27)
VITAMINS	MULTIVITAMINS WITH MINERALS	0.233568	1.11 (0.94 ,1.32)	37.48 (44.31 ,31.69)	33.85 (28.61 ,40.03)	3.64 (-2.55, 8.88)
VITAMINS	VITAMIN COMBINATIONS,OTHER
VITAMINS	VITAMINS,OTHER	1	0 (0 ,0)	0 (0 ,0)	0 (0 ,0)	0 (0, 0)
